# Supplementary material for: Health education for patients with acute coronary syndrome and type 2 diabetes mellitus: an umbrella review of systematic reviews and meta-analyses
Source: BMJ Open. 2017 Oct 16;7(10):e016857. doi: 10.1136/bmjopen-2017-016857 (PMC5652525; doi:10.1136/bmjopen-2017-016857)
Supplement: Supplementary appendix 1 [file bmjopen-2017-016857supp001.pdf]

## Supplementary Annex 1. Searching Strategies

| Items                   | Searching Strategy                                                                                                                                                                                                                                                                                                                                                                                                                                                                                                              | Results   |
|-------------------------|---------------------------------------------------------------------------------------------------------------------------------------------------------------------------------------------------------------------------------------------------------------------------------------------------------------------------------------------------------------------------------------------------------------------------------------------------------------------------------------------------------------------------------|-----------|
| <b>PubMed</b>           |                                                                                                                                                                                                                                                                                                                                                                                                                                                                                                                                 |           |
| #1                      | (((((((((Acute Coronary Syndrome[MeSH Terms]) OR Myocardial Infarction[MeSH Terms]) OR Angina, Unstable[MeSH Terms]) OR Coronary Artery Disease[MeSH Terms]) OR Coronary Artery Bypass[MeSH Terms]) OR Angina Pectoris[MeSH Terms]) OR "Myocardial Infarct*"[Title/Abstract]) OR "Unstable Angina*"[Title/Abstract]) OR "coronary heart diseas*"[Title/Abstract]) OR "Coronary Artery Disease*"[Title/Abstract]) OR "Unstable Angina Pectori*"[Title/Abstract] Filters: Publication date from 2000/01/01 to 2016/04/31; English | 145310    |
| #2                      | (((((Diabetes Mellitus, Type 2[MeSH Terms]) OR "Type 2 Diabetes Mellitus"[Title/Abstract]) OR "type 2 diabete*"[Title/Abstract]) OR "type ii diabet*"[Title/Abstract]) OR T2DM[Title/Abstract]) OR Adult-Onset Diabetes Mellitus[Title/Abstract] Filters: Publication date from 2000/01/01 to 2016/04/31; English                                                                                                                                                                                                               | 80218     |
| #3                      | #1 OR #2                                                                                                                                                                                                                                                                                                                                                                                                                                                                                                                        | 222103    |
| #4                      | ((((((Health Education[MeSH Terms]) OR Patient Education as Topic[MeSH Terms]) OR Counseling[MeSH Terms]) OR Social Support[MeSH Terms]) OR "Community Health Education*"[Title/Abstract]) OR "Educational Activit*"[Title/Abstract]) OR "Education* intervention*"[Title/Abstract]) OR "Education* program*"[Title/Abstract] Filters: Publication date from 2000/01/01 to 2016/04/31; English                                                                                                                                  | 122323    |
| #5                      | ((((Meta-Analysis [Publication Type]) OR Meta-Analysis as Topic[MeSH Terms]) OR "Systematic Revie*"[Title/Abstract]) OR "Meta-analys*"[Title/Abstract] Filters: Publication date from 2000/01/01 to 2016/04/31; English                                                                                                                                                                                                                                                                                                         | 165265    |
| #6                      | #3 AND #4 AND #5 Filters: Publication date from 2000/01/01 to 2016/04/31; English                                                                                                                                                                                                                                                                                                                                                                                                                                               | <b>54</b> |
| <b>Cochrane Library</b> |                                                                                                                                                                                                                                                                                                                                                                                                                                                                                                                                 |           |
| #1                      | MeSH descriptor: [Acute Coronary Syndrome] explode all trees                                                                                                                                                                                                                                                                                                                                                                                                                                                                    | 1070      |
| #2                      | MeSH descriptor: [Myocardial Infarction] explode all trees                                                                                                                                                                                                                                                                                                                                                                                                                                                                      | 9450      |
| #3                      | MeSH descriptor: [Angina, Unstable] explode all trees                                                                                                                                                                                                                                                                                                                                                                                                                                                                           | 1015      |
| #4                      | MeSH descriptor: [Coronary Artery Disease] explode all trees                                                                                                                                                                                                                                                                                                                                                                                                                                                                    | 3469      |

|                                                 |                                                                                                                                                                                                             |                |
|-------------------------------------------------|-------------------------------------------------------------------------------------------------------------------------------------------------------------------------------------------------------------|----------------|
| #5                                              | MeSH descriptor: [Coronary Artery Bypass] explode all trees                                                                                                                                                 | 5321           |
| #6                                              | MeSH descriptor: [Angina Pectoris] explode all trees                                                                                                                                                        | 4240           |
| #7                                              | "acute coronary syndrome":ti,ab,kw or Unstable Angina*:ti,ab,kw or Myocardial Infarct*:kw or coronary heart diseas*:ti,ab,kw or Coronary Artery Disease*:ti,ab,kw<br>(Word variations have been searched)   | 29379          |
| #8                                              | #1 or #2 or #3 or #4 or #5 or #6 or #7                                                                                                                                                                      | 34062          |
| #9                                              | MeSH descriptor: [Diabetes Mellitus, Type 2] explode all trees                                                                                                                                              | 10474          |
| #10                                             | Type 2 Diabetes Mellitus:ti,ab,kw or type ii diabet*:ti,ab,kw or noninsulin dependent:ti,ab,kw or type 2 diabet*:ti,ab,kw or Adult-Onset Diabetes Mellitus:ti,ab,kw<br>(Word variations have been searched) | 20935          |
| #11                                             | #9 or #10                                                                                                                                                                                                   | 20937          |
| #12                                             | #8 or #11                                                                                                                                                                                                   | 53777          |
| #13                                             | MeSH descriptor: [Health Education] explode all trees                                                                                                                                                       | 11291          |
| #14                                             | MeSH descriptor: [Patient Education as Topic] explode all trees                                                                                                                                             | 7507           |
| #15                                             | MeSH descriptor: [Counseling] explode all trees                                                                                                                                                             | 4026           |
| #16                                             | MeSH descriptor: [Rehabilitation Nursing] explode all trees                                                                                                                                                 | 55             |
| #17                                             | Education*:ti,ab,kw or Community Health Education:ti,ab,kw or Self-Management*:ti,ab,kw or Cardiac Rehabilitation:ti,ab,kw (Word variations have been searched)                                             | 40078          |
| #18                                             | #13 or #14 or #15 or #16 or #17                                                                                                                                                                             | 42943          |
| #19                                             | #12 and #18 Publication Year from 2000 to 2016, in Cochrane Reviews (Reviews only) and Other Reviews                                                                                                        | 120            |
| #20                                             | Cochrane reviews + other reviews                                                                                                                                                                            | 49 +<br>71=120 |
| <b>Joanna Briggs Institute,_Embase,_MEDLINE</b> |                                                                                                                                                                                                             |                |
| #1                                              | Acute Coronary Syndrome.m_titl.                                                                                                                                                                             | 16727          |
| #2                                              | Myocardial Infarction.m_titl.                                                                                                                                                                               | 151398         |

|     |                                                                                                                   |        |
|-----|-------------------------------------------------------------------------------------------------------------------|--------|
| #3  | Unstable Angina.m_titl.                                                                                           | 6933   |
| #4  | Coronary Artery Disease.m_titl.                                                                                   | 54621  |
| #5  | Coronary Artery Bypass.m_titl.                                                                                    | 30449  |
| #6  | Angina Pectoris.m_titl.                                                                                           | 17997  |
| #7  | Coronary Heart Disease.m_titl.                                                                                    | 35397  |
| #8  | #1 or #2 or #3 or #4 or #5 or #6                                                                                  | 305035 |
| #9  | Type 2 Diabetes Mellitus.mp. [mp=ti, ab, ot, nm, hw, kf, px, rx, ui, an, tx, sh, ct, sa, tn, dm, mf, dv, kw]      | 64926  |
| #10 | "type 2 diabet*".m_titl.                                                                                          | 102596 |
| #11 | "type ii diabet*".m_titl.                                                                                         | 6139   |
| #12 | Adult-Onset Diabetes Mellitus.mp. [mp=ti, ab, ot, nm, hw, kf, px, rx, ui, an, tx, sh, ct, sa, tn, dm, mf, dv, kw] | 307    |
| #13 | #9 or #10 or #11 or #12                                                                                           | 136982 |
| #14 | #8 or #13                                                                                                         | 439243 |
| #15 | Health Education.mp. [mp=ti, ab, ot, nm, hw, kf, px, rx, ui, an, tx, sh, ct, sa, tn, dm, mf, dv, kw]              | 177285 |
| #16 | Patient Education.mp. [mp=ti, ab, ot, nm, hw, kf, px, rx, ui, an, tx, sh, ct, sa, tn, dm, mf, dv, kw]             | 185631 |
| #17 | Counseling.m_titl.                                                                                                | 23527  |
| #18 | Social Support.m_titl.                                                                                            | 11535  |
| #19 | "Education*".m_titl.                                                                                              | 247901 |
| #20 | #15 or #16 or #17 or #18 or #19                                                                                   | 577203 |
| #21 | #14 and #20                                                                                                       | 6480   |
| #22 | Systematic Review.mp. [mp=ti, ab, ot, nm, hw, kf, px, rx, ui, an, tx, sh, ct, sa, tn, dm, mf, dv, kw]             | 212014 |
| #23 | Meta-Analysis.mp. [mp=ti, ab, ot, nm, hw, kf, px, rx, ui, an, tx, sh, ct, sa, tn, dm, mf, dv, kw]                 | 262009 |
| #24 | #22 or #23                                                                                                        | 381113 |

|                                                                          |                                                                      |            |
|--------------------------------------------------------------------------|----------------------------------------------------------------------|------------|
| #25                                                                      | #21 and #24                                                          | 288        |
| #26                                                                      | limit 25 to English and yr="2000 - 2016"                             | <b>263</b> |
| <b>Cumulative Index to Nursing and Allied Health Literature (CINAHL)</b> |                                                                      |            |
| #1                                                                       | TI Acute Coronary Syndrome OR AB Acute Coronary Syndrome             | 4826       |
| #2                                                                       | TI Myocardial Infarction OR AB Myocardial Infarction                 | 24578      |
| #3                                                                       | TI Unstable Angina OR AB Unstable Angina                             | 1353       |
| #4                                                                       | TI Coronary Artery Disease OR AB Coronary Artery Disease             | 12930      |
| #5                                                                       | TI Coronary Heart Disease OR AB Coronary Heart Disease               | 12321      |
| #6                                                                       | #1 OR #2 OR #3 OR #4 OR #5                                           | 46436      |
| #7                                                                       | TI Type 2 Diabetes Mellitus OR AB Type 2 Diabetes Mellitus           | 8952       |
| #8                                                                       | TI type 2 diabet* OR AB type 2 diabet*                               | 33085      |
| #9                                                                       | TI Adult-Onset Diabetes Mellitus OR AB Adult-Onset Diabetes Mellitus | 23         |
| #10                                                                      | #7 OR #8 OR #9                                                       | 33097      |
| #11                                                                      | #6 OR #10                                                            | 77923      |
| #12                                                                      | TI Health Education OR AB Health Education                           | 53415      |
| #13                                                                      | TI Patient Education OR AB Patient Education                         | 37789      |
| #14                                                                      | TI Counseling OR AB Counseling                                       | 17673      |
| #15                                                                      | TI Social Support OR AB Social Support                               | 30093      |
| #16                                                                      | TI Education* OR AB Education*                                       | 188291     |
| #17                                                                      | #12 OR #13 OR #14 OR #15 OR #16                                      | 227269     |
| #18                                                                      | #11 AND #17                                                          | 4707       |
| #19                                                                      | TI Systematic Review OR AB Systematic Review                         | 48830      |

|                       |                                                                                                                                                                                                                                                                                  |        |
|-----------------------|----------------------------------------------------------------------------------------------------------------------------------------------------------------------------------------------------------------------------------------------------------------------------------|--------|
| #20                   | TI Meta-Analysis OR AB Meta-Analysis                                                                                                                                                                                                                                             | 28776  |
| #21                   | #19 OR #20                                                                                                                                                                                                                                                                       | 64611  |
| #22                   | S18 AND S21 Limiters - Published Date: 20000101-20160431; English Language                                                                                                                                                                                                       | 129    |
| <b>Web of Science</b> |                                                                                                                                                                                                                                                                                  |        |
| #1                    | TS=("Acute Coronary Syndrome*") OR TS=("Myocardial Infarct*") OR TS=("Unstable Angina") OR TS=("Coronary Artery Disease*") OR TS=("Coronary heart disease*")<br>Indexes=SCI-EXPANDED, SSCI, A&HCI, CPCI-S, CPCI-SSH, BKCI-S, BKCI-SSH, ESCI, CCR-EXPANDED, IC Timespan=All years | 404699 |
| #2                    | TS=("Type 2 Diabetes Mellitus") OR TS=("type 2 diabete*") OR TS=("Noninsulin-Dependent Diabete*") OR TS= ("Adult-Onset Diabetes Mellitus")<br>Indexes=SCI-EXPANDED, SSCI, A&HCI, CPCI-S, CPCI-SSH, BKCI-S, BKCI-SSH, ESCI, CCR-EXPANDED, IC Timespan=All years                   | 103548 |
| #3                    | #2 OR #1<br>Indexes=SCI-EXPANDED, SSCI, A&HCI, CPCI-S, CPCI-SSH, BKCI-S, BKCI-SSH, ESCI, CCR-EXPANDED, IC Timespan=All years                                                                                                                                                     | 495081 |
| #4                    | TS=("Health Education") OR TS=("Patient Education")<br>Indexes=SCI-EXPANDED, SSCI, A&HCI, CPCI-S, CPCI-SSH, BKCI-S, BKCI-SSH, ESCI, CCR-EXPANDED, IC Timespan=All years                                                                                                          | 29830  |
| #5                    | #4 AND #3<br>Indexes=SCI-EXPANDED, SSCI, A&HCI, CPCI-S, CPCI-SSH, BKCI-S, BKCI-SSH, ESCI, CCR-EXPANDED, IC Timespan=All years                                                                                                                                                    | 1290   |
| #6                    | TS=("Systematic Review*") OR TS=("Meta-analysis*")<br>Indexes=SCI-EXPANDED, SSCI, A&HCI, CPCI-S, CPCI-SSH, BKCI-S, BKCI-SSH, ESCI, CCR-EXPANDED, IC Timespan=All years                                                                                                           | 149663 |
| #7                    | (#6 AND #5) AND LANGUAGE: (English)<br>Indexes=SCI-EXPANDED, SSCI, A&HCI, CPCI-S, CPCI-SSH, BKCI-S, BKCI-SSH, ESCI, CCR-EXPANDED, IC Timespan=2000-2016                                                                                                                          | 68     |
| <b>Journals@Ovid</b>  |                                                                                                                                                                                                                                                                                  |        |
| #1                    | Acute Coronary Syndrome.m_titl.                                                                                                                                                                                                                                                  | 3021   |
| #2                    | Myocardial Infarction.m_titl.                                                                                                                                                                                                                                                    | 24269  |
| #3                    | Unstable Angina.m_titl.                                                                                                                                                                                                                                                          | 1038   |
| #4                    | Coronary Artery Disease.m_titl.                                                                                                                                                                                                                                                  | 10106  |
| #5                    | Coronary Artery Bypass.m_titl.                                                                                                                                                                                                                                                   | 6546   |
| #6                    | Angina Pectoris.m_titl.                                                                                                                                                                                                                                                          | 1480   |

|     |                                                                                                       |        |
|-----|-------------------------------------------------------------------------------------------------------|--------|
| #7  | Coronary Heart Disease.m_titl.                                                                        | 6487   |
| #8  | #1 or #2 or #3 or #4 or #5 or #6                                                                      | 51548  |
| #9  | Type 2 Diabetes Mellitus. m_titl.                                                                     | 5097   |
| #10 | "type 2 diabet*".m_titl.                                                                              | 26434  |
| #11 | "type ii diabet*".m_titl.                                                                             | 980    |
| #12 | Adult-Onset Diabetes Mellitus. m_titl.                                                                | 391    |
| #13 | #9 or #10 or #11 or #12                                                                               | 27795  |
| #14 | #8 or #13                                                                                             | 78792  |
| #15 | Health Education. m_titl.                                                                             | 1135   |
| #16 | Patient Education. m_titl.                                                                            | 1556   |
| #17 | Counseling.m_titl.                                                                                    | 5532   |
| #18 | Social Support.m_titl.                                                                                | 2667   |
| #19 | "Education*".m_titl.                                                                                  | 50950  |
| #20 | #15 or #16 or #17 or #18 or #19                                                                       | 58969  |
| #21 | #14 and #20                                                                                           | 510    |
| #22 | Systematic Review.mp. [mp=ti, ab, ot, nm, hw, kf, px, rx, ui, an, tx, sh, ct, sa, tn, dm, mf, dv, kw] | 117790 |
| #23 | Meta-Analysis.mp. [mp=ti, ab, ot, nm, hw, kf, px, rx, ui, an, tx, sh, ct, sa, tn, dm, mf, dv, kw]     | 215069 |
| #24 | #22 or #23                                                                                            | 282984 |
| #25 | #21 and #24                                                                                           | 61     |
| #26 | limit 26 to yr="2000 - 2016"                                                                          | 58     |

## Supplementary Annex 2.

**Citation Matrix:** Non-repeated trials (rows) included in the 15 systematic review and/or meta-analyses (column)--ACS.

| Author-year ( Trial reference)                                                                                                                                                                                                                                                                                                  | Barth, Jacob, Dahan, & Critchley, 2015 | Devi et al., 2015 | Ghisi, Abdallah, Grace, Thomas, & Oh, 2014 | Kotb, Hsieh, & Wells, 2014 | Brown, Clark, Dalal, Welch, & Taylor, 2013 | Dickens et al., 2013 | Aldcroft, Taylor, Blackstock, & O'Halloran P, 2011 | Brown, Clark, Dalal, Welch, & Taylor, 2011 | Huttunen-Lenz, Song, & Poland, 2010 | Goulding, Furze, & Birks, 2010 | Auer, Gaume, Rodondi, Cornuz, & Ghali, 2008 | J. Barth, Critchley, & Bengel, 2008 | Fernandez et al., 2007 | J. Barth, Critchley, & Bengel, 2006 | Clark, Hartling, Vandermeer, & McAlister, 2005 |
|---------------------------------------------------------------------------------------------------------------------------------------------------------------------------------------------------------------------------------------------------------------------------------------------------------------------------------|----------------------------------------|-------------------|--------------------------------------------|----------------------------|--------------------------------------------|----------------------|----------------------------------------------------|--------------------------------------------|-------------------------------------|--------------------------------|---------------------------------------------|-------------------------------------|------------------------|-------------------------------------|------------------------------------------------|
| Allen JK. Coronary risk factor modification in women after coronary artery bypass surgery. Nursing Research 1996;45(5):260-5.                                                                                                                                                                                                   | X                                      |                   |                                            |                            |                                            |                      |                                                    |                                            |                                     |                                |                                             | X                                   |                        |                                     |                                                |
| Burt A, Thomley R, Illingworth D, White P, Shaw TR, Turner R. Stopping smoking after myocardial infarction. Lancet 1974;1(7852):304-6.                                                                                                                                                                                          | X                                      |                   |                                            |                            |                                            |                      |                                                    |                                            |                                     |                                |                                             | X                                   |                        | X                                   |                                                |
| Carlsson R, Lindberg G, Westin L, Israelsson B. Influence of coronary nursing management follow up on lifestyle after acute myocardial infarction. Heart 1997;77(3):256-9.                                                                                                                                                      | X                                      |                   |                                            |                            |                                            |                      |                                                    |                                            |                                     |                                |                                             | X                                   |                        |                                     |                                                |
| Ockene J, Kristeller JL, Goldberg R, Ockene I, Merriam P, Barrett S, et al. Smoking cessation and severity of disease: the Coronary Artery Smoking Intervention Study. Health Psychology 1992;11(2):119-26.                                                                                                                     | X                                      |                   |                                            |                            |                                            |                      |                                                    |                                            |                                     |                                |                                             | X                                   |                        |                                     |                                                |
| DeBusk R, Miller NH, Superko R, Dennis CA, Thomas RJ, et al. A case-management system for coronary risk factor modification after acute myocardial infarction. Annals of Internal Medicine 1994;120(9):721-9.                                                                                                                   | X                                      |                   |                                            |                            |                                            |                      |                                                    |                                            |                                     |                                | X                                           | X                                   |                        |                                     | X                                              |
| Domelas EA, Sampson RA, Gray J F, Waters D, Thompson PD. A randomized controlled trial of smoking cessation counseling after myocardial infarction. Preventive Medicine 2000;30(4):261-8.                                                                                                                                       | X                                      |                   |                                            |                            |                                            |                      |                                                    |                                            | X                                   |                                |                                             | X                                   |                        | X                                   |                                                |
| Hajek P, Taylor TZ, Mills P. Brief intervention during hospital admission to help patients to give up smoking after myocardial infarction and bypass surgery: randomised controlled trial. BMJ 2002;324:87-9.                                                                                                                   | X                                      |                   |                                            |                            |                                            |                      |                                                    |                                            | X                                   |                                |                                             | X                                   |                        | X                                   |                                                |
| Heller RF, Knapp JC, Valenti LA, Dobson AJ. Secondary prevention after acute myocardial infarction. American Journal of Cardiology 1993;72(11):759-62.                                                                                                                                                                          | X                                      |                   |                                            |                            |                                            |                      |                                                    |                                            |                                     |                                |                                             | X                                   | X                      | X                                   |                                                |
| Moreno Ortigosa A, Ochoa Gomez FJ, Ramalle-Gomara E, Saralegui Reta I, Fernandez Esteban MV, Quintana Diaz M. Efficacy of an smoking cessation intervention for patients with myocardial infarction [Eficacia de una intervencion para dejar de fumar en pacientes con infarto de miocardio]. Medicina Clinica 2000;114:209-10. | X                                      |                   |                                            |                            |                                            |                      |                                                    |                                            |                                     |                                |                                             | X                                   |                        | X                                   |                                                |
| Quist-Paulsen P, Gallefoss F. Randomised controlled trial of smoking cessation intervention after admission for coronary heart disease. BMJ 2003;327(7426):1254-7.                                                                                                                                                              | X                                      |                   |                                            |                            |                                            |                      |                                                    |                                            | X                                   |                                |                                             | X                                   |                        | X                                   |                                                |
| Reid R, Pipe A, Higginson LK, D'Angelo MS, Cooke D, Dafoe W. Stepped care approach to smoking cessation in patients hospitalized for coronary artery disease. Journal                                                                                                                                                           | X                                      |                   |                                            |                            |                                            |                      |                                                    |                                            |                                     |                                |                                             | X                                   |                        | X                                   |                                                |

|                                                                                                                                                                                                                                                                                                        |   |   |   |   |  |  |  |  |   |   |   |   |   |   |
|--------------------------------------------------------------------------------------------------------------------------------------------------------------------------------------------------------------------------------------------------------------------------------------------------------|---|---|---|---|--|--|--|--|---|---|---|---|---|---|
| of Cardiopulmonary Rehabilitation 2003;23(3):176-82.                                                                                                                                                                                                                                                   |   |   |   |   |  |  |  |  |   |   |   |   |   |   |
| Rigotti NA, McKool KM, Shiffmann S. Predictors of smoking cessation after coronary artery bypass graft surgery. Annals of Internal Medicine 1994;120(4):287-93.                                                                                                                                        | X |   |   |   |  |  |  |  | X |   |   | X |   | X |
| Sivarajan ES, Newton KM, Almes MJ, Kempf TM, Mansfield LW, Bruce RA. Limited effects of outpatient teaching and counseling after myocardial infarction: a controlled study. Heart & Lung 1983;12(1):65-73.                                                                                             | X |   |   |   |  |  |  |  |   |   |   |   |   | X |
| Taylor CB, Houston-Miller N, Killen JD, DeBusk RF. Smoking cessation after acute myocardial infarction: effects of a nurse-managed intervention. Annals of Internal Medicine 1990;113(2):118-23.                                                                                                       | X |   |   |   |  |  |  |  | X |   |   | X | X |   |
| Van Elderen T, Maes S, Seegers G. Effects of a group health education program for coronary heart patients after the hospitalization phase. Tijdschrift voor Psychologie & Gezondheid 1991;19(3):129-44.                                                                                                | X |   |   |   |  |  |  |  |   |   | X |   |   |   |
| van Elderen-van Kemenade T, Maes S, van den Broek Y. Effects of a health education programme with telephone follow-up during cardiac rehabilitation. British Journal of Clinical Psychology 1994;33(Pt 3):367-78.                                                                                      | X |   | X | X |  |  |  |  |   | X | X |   | X |   |
| Antypas K, Wangberg SC. An Internet- and mobile-based tailored intervention to enhance maintenance of physical activity after cardiac rehabilitation: short-term results of a randomized controlled trial. Journal of Medical Internet Research 2014;16(3):e77.                                        |   | X |   |   |  |  |  |  |   |   |   |   |   |   |
| Devi R, Powell J, Singh S. A web-based program improves physical activity outcomes in a primary care angina population: randomized controlled trial. Journal of Medical Internet Research 2014;16(9):e186.                                                                                             |   | X |   |   |  |  |  |  |   |   |   |   |   |   |
| Frederix I, Van Driessche N, Hansen D, Berger J, Bonne K, Alders T, et al. Increasing the medium-term clinical benefits of hospital-based cardiac rehabilitation by physical activity telemonitoring in coronary artery disease patients. European Journal of Preventive Cardiology 2015;22(2):150-8.  |   | X |   |   |  |  |  |  |   |   |   |   |   |   |
| Lear SA, Singer J, Banner-Lukaris D, Horvat D, Park JE, Bates J, et al. Randomized trial of a virtual cardiac rehabilitation program delivered at a distance via the internet. Circulation: Cardiovascular Quality and Outcomes 2014;7(6):952-9.                                                       |   | X |   |   |  |  |  |  |   |   |   |   |   |   |
| Lindsay S, Bellaby P, Smith S, Baker R. Enabling healthy choices: is ICT the highway to health improvement?. Health (London, England: 1997) 2008;12(3):313-31.                                                                                                                                         |   | X |   |   |  |  |  |  |   |   |   |   |   |   |
| Maddison R, Pfäeffli L, Whittaker R, Stewart R, Kerr A, Jiang Y, et al. A mobile phone intervention increases physical activity in people with cardiovascular disease: Results from the HEART randomized controlled trial. European Journal of Preventive Cardiology 2014 May 9 [Epub ahead of print]. |   | X |   |   |  |  |  |  |   |   |   |   |   |   |
| Reid RD, Morrin LI, Beaton LJ, Papadakis S, Kocourek J, McDonnell L, et al. Randomized trial of an internet-based computer-tailored expert system for physical activity in patients with heart disease. European Journal of Preventive Cardiology 2012;19(6):1357-64.                                  |   | X |   |   |  |  |  |  |   |   |   |   |   |   |

|                                                                                                                                                                                                                                                                                                                                                               |  |   |  |  |   |   |  |   |  |  |  |  |   |  |  |
|---------------------------------------------------------------------------------------------------------------------------------------------------------------------------------------------------------------------------------------------------------------------------------------------------------------------------------------------------------------|--|---|--|--|---|---|--|---|--|--|--|--|---|--|--|
| Southard BH, Southard DR, Nuckolls J. Clinical trial of an Internet-based case management system for secondary prevention of heart disease. Journal of Cardiopulmonary Rehabilitation and Prevention 2003;23(5):341-8.                                                                                                                                        |  | X |  |  | X | X |  | X |  |  |  |  | X |  |  |
| Varnfield M, Karunanihi M, Lee CK, Honeyman E, Arnold D, Ding H, et al. Smartphone-based home care model improved use of cardiac rehabilitation in postmyocardial infarction patients: results from a randomised controlled trial. Heart 2014;100(22):1770-9.                                                                                                 |  | X |  |  |   |   |  |   |  |  |  |  |   |  |  |
| Vernooij JW, Kaasjager HA, van der Graaf Y, Wierdsma J, Grandjean HM, Hovens MM, et al. Internet based vascular risk factor management for patients with clinically manifest vascular disease: randomised controlled trial. BMJ (Clinical research ed.) 2012;344:e3750.                                                                                       |  | X |  |  |   |   |  |   |  |  |  |  |   |  |  |
| Zutz A, Ignaszewski A, Bates J, Lear SA. Utilization of the Internet to deliver cardiac rehabilitation at a distance: a pilot study. Telemedicine Journal and e-Health 2007;13(3):323-30.                                                                                                                                                                     |  | X |  |  |   |   |  |   |  |  |  |  |   |  |  |
| Dale L, Whittaker R, Jiang Y, Stewart R, Rolleston A, Maddison R. Improving coronary heart disease self-management using mobile technologies (Text4Heart): a randomised controlled trial protocol. Trials 2014;15:71.                                                                                                                                         |  | X |  |  |   |   |  |   |  |  |  |  |   |  |  |
| ISRCTN29243064. Effectiveness of a comprehensive telerehabilitation program for the heart. <a href="http://www.controlled-trials.com/ISRCTN29243064">http://www.controlled-trials.com/ISRCTN29243064</a> (accessed January 2015).                                                                                                                             |  | X |  |  |   |   |  |   |  |  |  |  |   |  |  |
| NCT02228603. How to enhance physical activity after cardiac rehabilitation? A randomised controlled study comparing two follow-up training exercise programs. <a href="https://clinicaltrials.gov/show/NCT02228603">https://clinicaltrials.gov/show/NCT02228603</a> (accessed January 2015).                                                                  |  | X |  |  |   |   |  |   |  |  |  |  |   |  |  |
| NCT02350192. Effectiveness of an e-health educational intervention for cardiovascular disease adults in improving total exercise and outcomes. <a href="https://clinicaltrials.gov/ct2/show/NCT02350192">https://clinicaltrials.gov/ct2/show/NCT02350192</a> (accessed January 2015).                                                                         |  | X |  |  |   |   |  |   |  |  |  |  |   |  |  |
| Redfern J, Usherwood T, Harris MF, Rodgers A, Hayman N, Panaretto K, et al. A randomised controlled trial of a consumer-focused e-health strategy for cardiovascular risk management in primary care: the Consumer Navigation of Electronic Cardiovascular Tools (CONNECT) study protocol. BMJ Open 2014; Vol. 4, issue 2. [DOI: 10.1136/bmjopen-2013-004523] |  | X |  |  |   |   |  |   |  |  |  |  |   |  |  |
| Reinwand D, Kuhlmann T, Wienert J, Vries HD, Lippke S. Designing a theory- and evidence-based tailored eHealth rehabilitation aftercare program in Germany and the Netherlands: study protocol. BMC Public Health 2013;13:1081.                                                                                                                               |  | X |  |  |   |   |  |   |  |  |  |  |   |  |  |
| Shah B, Adams M, Peterson E, Powers B, Oddone E, Royal K, et al. Secondary Prevention Risk Interventions Via Telemedicine and Tailored Patient Education (SPRITE): A randomized trial to improve postmyocardial infarction management. Circulation: Cardiovascular Quality and Outcomes 2011;4(2):235-42.                                                     |  | X |  |  |   |   |  |   |  |  |  |  |   |  |  |

|                                                                                                                                                                                                                                                                                                                                                                   |  |  |   |  |  |  |  |  |  |   |  |  |  |  |
|-------------------------------------------------------------------------------------------------------------------------------------------------------------------------------------------------------------------------------------------------------------------------------------------------------------------------------------------------------------------|--|--|---|--|--|--|--|--|--|---|--|--|--|--|
| T. Buckley, S. McKinley, R. Gallagher, K. Dracup, D.K. Moser, L.M. Aitken<br>The effect of education and counselling on knowledge, attitudes and beliefs about responses to acute myocardial infarction symptoms<br>Eur J Cardiovasc Nurs, 6 (2007), pp. 105–111                                                                                                  |  |  | X |  |  |  |  |  |  | X |  |  |  |  |
| J.J. Carlson, G.J. Norman, D.L. Feltz, B.A. Franklin, J.A. Johnson, S.K. Locke<br>Self-efficacy, psychosocial factors, and exercise behavior in traditional versus modified cardiac rehabilitation<br>J Cardpulm Rehabil, 21 (2001), pp. 363–373                                                                                                                  |  |  | X |  |  |  |  |  |  |   |  |  |  |  |
| S.S. Chan, D.Y. Leung, D.C. Wong, C.P. Lau, V.T. Wong, T.H. Lam<br>A randomized controlled trial of stage-matched intervention for smoking cessation in cardiac-outpatients<br>Addiction, 107 (2012), pp. 829–837                                                                                                                                                 |  |  | X |  |  |  |  |  |  |   |  |  |  |  |
| K.M. Cordasco, S.M. Asch, D.S. Bell, J.J. Guterman, S. Gross-Schulman, L. Ramer, et al.<br>A low-literacy medication education tool for safety-net hospital patients<br>Am J Prev Med, 37 (2009), pp. S209–S216                                                                                                                                                   |  |  | X |  |  |  |  |  |  |   |  |  |  |  |
| M.H. Eckman, R. Wise, A.C. Leonard, E. Dixon, C. Burrows, F. Khan, et al.<br>Impact of health literacy on outcomes and effectiveness of an educational intervention in patients with chronic diseases<br>Patient Educ Couns, 87 (2012), pp. 143–151                                                                                                               |  |  | X |  |  |  |  |  |  |   |  |  |  |  |
| P. Giannuzzi, P.L. Temporelli, R. Marchioli, A.P. Maggioni, G. Balestroni, V. Ceci, et al.<br>Global secondary prevention strategies to limit event recurrence after myocardial infarction: results of the GOSPEL study, a multicenter, randomized controlled trial from the Italian Cardiac Rehabilitation Network<br>Arch Intern Med, 168 (2008), pp. 2194–2204 |  |  | X |  |  |  |  |  |  |   |  |  |  |  |
| K.B. Heidal, N.M. Lewis, S.M. Evans, L. Boeckner<br>Nutrition education intervention increases total n – 3 fatty acid intakes in heart patients living in the Midwest<br>Nutr Res, 27 (2007), pp. 33–37                                                                                                                                                           |  |  | X |  |  |  |  |  |  |   |  |  |  |  |
| L. Horlick, R. Cameron, W. Firor, U. Bhalerao, R. Baltzan<br>The effects of education and group discussion in the post myocardial infarction patient<br>J Psychosom Res, 28 (1984), pp. 485–492                                                                                                                                                                   |  |  | X |  |  |  |  |  |  |   |  |  |  |  |
| H.S. Jeong, J.S. Chae, J.S. Moon, Y.S. Yoo<br>An individualized teaching program for atherosclerotic risk factor reduction in patients with myocardial infarction<br>Yonsei Med J, 43 (2002), pp. 93–100                                                                                                                                                          |  |  | X |  |  |  |  |  |  |   |  |  |  |  |
| X. Jiang, J.W. Sit, T.K. Wong<br>A nurse-led cardiac rehabilitation programme improves health behaviours and cardiac physiological risk                                                                                                                                                                                                                           |  |  | X |  |  |  |  |  |  |   |  |  |  |  |

|                                                                                                                                                                                                                                                                                                                                                |  |  |   |  |  |   |  |  |   |   |  |  |  |   |
|------------------------------------------------------------------------------------------------------------------------------------------------------------------------------------------------------------------------------------------------------------------------------------------------------------------------------------------------|--|--|---|--|--|---|--|--|---|---|--|--|--|---|
| parameters: evidence from Chengdu, China<br>J Clin Nurs, 16 (2007), pp. 1886–1897                                                                                                                                                                                                                                                              |  |  |   |  |  |   |  |  |   |   |  |  |  |   |
| M. Kummel, T. Vahlberg, A. Ojanlatva, R. Karki, T. Mattila, S.L. Kivela<br>Effects of an intervention on health behaviors of older coronary artery bypass (CAB) patients<br>Arch Gerontol Geriatr, 46 (2008), pp. 227–244                                                                                                                      |  |  | X |  |  |   |  |  |   |   |  |  |  |   |
| W.S. Leslie, C.R. Hankey, D. Matthews, J.E.P. Currall, M.E.J. Lean<br>A transferable programme of nutritional counselling for rehabilitation following myocardial infarction: a randomised controlled study<br>Eur J Clin Nutr, 58 (2004), pp. 778–786                                                                                         |  |  | X |  |  |   |  |  |   |   |  |  |  |   |
| E. Lidell, B. Fridlund<br>Long-term effects of a comprehensive rehabilitation programme after myocardial infarction<br>Scand J Caring Sci, 10 (1996), pp. 67–74                                                                                                                                                                                |  |  | X |  |  |   |  |  | X |   |  |  |  |   |
| S. Lindsay, S. Smith, P. Bellaby, R. Baker<br>The health impact of an online heart disease support group: a comparison of moderated versus unmoderated support<br>Health Educ Res, 24 (2009), pp. 646–654                                                                                                                                      |  |  | X |  |  |   |  |  |   |   |  |  |  |   |
| R.A. Mayou, D.R. Thompson, A. Clements, C.H. Davies, S.J. Goodwin, K. Normington, et al.<br>Guideline-based early rehabilitation after myocardial infarction: a pragmatic randomised controlled trial<br>J Psychosom Res, 52 (2002), pp. 89–95                                                                                                 |  |  | X |  |  |   |  |  |   | X |  |  |  |   |
| S. McKinley, K. Dracup, D.K. Moser, B. Riegel, L.V. Doering, H. Meischke, et al.<br>The effect of a short one-on-one nursing intervention on knowledge, attitudes and beliefs related to response to acute coronary syndrome in people with coronary heart disease: a randomized controlled trial<br>Int J Nurs Stud, 46 (2009), pp. 1037–1046 |  |  | X |  |  |   |  |  |   |   |  |  |  |   |
| S.M. Moore, M.A. Dolansky<br>Randomized trial of a home recovery intervention following coronary artery bypass surgery<br>Res Nurs Health, 24 (2001), pp. 93–104                                                                                                                                                                               |  |  | X |  |  | X |  |  |   |   |  |  |  |   |
| B. Oldenburg, A. Martin, J. Greenwood, L. Bernstein, R. Allan<br>A controlled trial of a behavioral and educational intervention following coronary artery bypass surgery<br>J Cardpulm Rehabil, 15 (1995), pp. 39–46                                                                                                                          |  |  | X |  |  |   |  |  |   |   |  |  |  |   |
| J.E. Otterstad<br>Influence on lifestyle measures and five-year coronary risk by a comprehensive lifestyle intervention programme in patients with coronary heart disease<br>Eur J Cardiovasc Prev Rehabil, 10 (2003), pp. 429–437                                                                                                             |  |  | X |  |  |   |  |  |   |   |  |  |  | X |
| P.M. Smith, E. Burgess                                                                                                                                                                                                                                                                                                                         |  |  | X |  |  |   |  |  | X |   |  |  |  |   |

|                                                                                                                                                                                                                                                     |  |  |   |  |  |  |  |  |  |  |  |  |   |  |
|-----------------------------------------------------------------------------------------------------------------------------------------------------------------------------------------------------------------------------------------------------|--|--|---|--|--|--|--|--|--|--|--|--|---|--|
| Smoking cessation initiated during hospital stay for patients with coronary artery disease: a randomized controlled trial<br>CMAJ, 180 (2009), pp. 1297–1303                                                                                        |  |  |   |  |  |  |  |  |  |  |  |  |   |  |
| T.M. Van Elderen, S. Maes, G. Seegers, H. Kragten, L. Relik-Can Wely<br>Effects of a post-hospitalization group health education programme for patients with coronary heart disease<br>Psychol Health, 9 (1994), pp. 317–330                        |  |  | X |  |  |  |  |  |  |  |  |  | X |  |
| J. Wolkstein-Bartnik, H. Pogorzelska, A. Bartnik<br>Patient education and quality of home-based rehabilitation in patients older than 60 years after acute myocardial infarction<br>J Cardiopulm Rehabil Prev, 31 (2011), pp. 249–253               |  |  | X |  |  |  |  |  |  |  |  |  |   |  |
| C. Froger-Bompas, B. Laviolle, P. Guillo, C. Letellier, K. Ligier, J.C. Daubert, et al.<br>Sustained positive impact of a coronary rehabilitation programme on adherence to dietary recommendations<br>Arch Cardiovasc Dis, 102 (2009), pp. 97–104  |  |  | X |  |  |  |  |  |  |  |  |  |   |  |
| B.J. Linde, N.M. Janz<br>Effect of a teaching program on knowledge and compliance of cardiac patients<br>Nurs Res, 28 (1979), pp. 282–286                                                                                                           |  |  | X |  |  |  |  |  |  |  |  |  |   |  |
| J. Oliveira, F. Ribeiro, H. Gomes<br>Effects of a home-based cardiac rehabilitation program on the physical activity levels of patients with coronary artery disease<br>J Cardiopulm Rehabil Prev, 28 (2008), pp. 392–396                           |  |  | X |  |  |  |  |  |  |  |  |  |   |  |
| R. Song, H. Lee<br>Managing health habits for myocardial infarction (MI) patients<br>Int J Nurs Stud, 38 (2001), pp. 375–380                                                                                                                        |  |  | X |  |  |  |  |  |  |  |  |  |   |  |
| B.L. Verges, B. Patois-Verges, M. Cohen, J.M. Casillas<br>Comprehensive cardiac rehabilitation improves the control of dyslipidemia in secondary prevention<br>J Cardpulm Rehabil, 18 (1998), pp. 408–415                                           |  |  | X |  |  |  |  |  |  |  |  |  |   |  |
| T. Yoshida, M. Kohzuki, K. Yoshida, M. Hiwatari, M. Kamimoto, C. Yamamoto, et al.<br>Physical and psychological improvements after phase II cardiac rehabilitation in patients with myocardial infarction<br>Nurs Health Sci, 1 (1999), pp. 163–170 |  |  | X |  |  |  |  |  |  |  |  |  |   |  |
| G.F. Fletcher<br>Rehabilitation after coronary angioplasty—is it effective<br>Arch Phys Med Rehabil, 67 (1986), pp. 517–519                                                                                                                         |  |  | X |  |  |  |  |  |  |  |  |  |   |  |
| C.J. Frame, C.G. Green, D.G. Herr, M.L. Taylor<br>A 2-year stage of change evaluation of dietary fat and fruit and vegetable intake behaviors of cardiac rehabilitation patients                                                                    |  |  | X |  |  |  |  |  |  |  |  |  |   |  |

|                                                                                                                                                                                                                                                                                      |  |  |   |  |  |  |   |  |  |  |  |  |  |  |
|--------------------------------------------------------------------------------------------------------------------------------------------------------------------------------------------------------------------------------------------------------------------------------------|--|--|---|--|--|--|---|--|--|--|--|--|--|--|
| Am J Health Promot, 17 (2003), pp. 361–368                                                                                                                                                                                                                                           |  |  |   |  |  |  |   |  |  |  |  |  |  |  |
| S. Pelletier, S. Kundrat, C.M. Hasler<br>Effects of a functional foods nutrition education program with cardiac rehabilitation patients<br>J Cardpulm Rehabil, 23 (2003), pp. 334–340                                                                                                |  |  | X |  |  |  |   |  |  |  |  |  |  |  |
| L. Jensen<br>Self-administered cardiac medication program evaluation<br>Can J Cardiovasc Nurs, 13 (2003), pp. 35–44                                                                                                                                                                  |  |  | X |  |  |  |   |  |  |  |  |  |  |  |
| J. Lisspers, C. Hofman-Bang, R. Nordlander, L. Ryden, O. Sundin, A. Ohman, et al.<br>Multifactorial evaluation of a program for lifestyle behavior change in rehabilitation and secondary prevention of coronary artery disease<br>Scand Cardiovasc J, 33 (1999), pp. 9–16           |  |  | X |  |  |  |   |  |  |  |  |  |  |  |
| A. Palomaki, S. Miilunpalo, P. Holm, E. Makinen, K. Malminiemi<br>Effects of preventive group education on the resistance of LDL against oxidation and risk factors for coronary heart disease in bypass surgery patients<br>Ann Med, 34 (2002), pp. 272–283                         |  |  | X |  |  |  |   |  |  |  |  |  |  |  |
| M.T. Timlin, K.V. Shores, M. Reicks<br>Behavior change outcomes in an outpatient cardiac rehabilitation program<br>J Am Diet Assoc, 102 (2002), pp. 664–671                                                                                                                          |  |  | X |  |  |  |   |  |  |  |  |  |  |  |
| C. Bellman, K. Hambræus, J. Lindbäck, B. Lindahl<br>Achievement of secondary preventive goals after acute myocardial infarction: a comparison between participants and nonparticipants in a routine patient education program in Sweden<br>J Cardiovasc Nurs, 24 (2009), pp. 362–368 |  |  | X |  |  |  |   |  |  |  |  |  |  |  |
| K. Dracup, A.I. Meleis, S. Clark, A. Clyburn, L. Shields, M. Staley<br>Group counseling in cardiac rehabilitation: effect on patient compliance<br>Patient Educ Couns, 6 (1984), pp. 169–177                                                                                         |  |  | X |  |  |  | X |  |  |  |  |  |  |  |
| Z. Irmak, H. Fesci<br>Effects of nurse-managed secondary prevention program on lifestyle and risk factors of patients who had experienced myocardial infarction<br>Appl Nurs Res, 23 (2010), pp. 147–152                                                                             |  |  | X |  |  |  |   |  |  |  |  |  |  |  |
| J. Marshall, S. Penckofer, J. Llewellyn<br>Structured postoperative teaching and knowledge and compliance of patients who had coronary artery bypass surgery<br>Heart Lung, 15 (1986), pp. 76–82                                                                                     |  |  | X |  |  |  |   |  |  |  |  |  |  |  |
| T. Van Elderen, E. Dusseldorp<br>Lifestyle effects of group health education for patients with coronary heart disease                                                                                                                                                                |  |  | X |  |  |  |   |  |  |  |  |  |  |  |

|                                                                                                                                                                                                                                                                                                                       |  |  |   |   |  |   |  |   |  |  |  |  |  |  |  |
|-----------------------------------------------------------------------------------------------------------------------------------------------------------------------------------------------------------------------------------------------------------------------------------------------------------------------|--|--|---|---|--|---|--|---|--|--|--|--|--|--|--|
| Psychol Health, 16 (2001), pp. 327–341                                                                                                                                                                                                                                                                                |  |  |   |   |  |   |  |   |  |  |  |  |  |  |  |
| P. Davidson, M. Digiacomio, R. Zecchin, M. Clarke, G. Paul, K. Lamb, et al.<br>A cardiac rehabilitation program to improve psychosocial outcomes of women with heart disease<br>J Womens Health, 17 (2008), pp. 123–134                                                                                               |  |  | X |   |  |   |  |   |  |  |  |  |  |  |  |
| Arthur HM, Smith KM, Kodis J, McKelvie R (2002) A controlled trial of hospital versus home-based exercise in cardiac patients. Medicine and Science in Sports and Exercise. 34(10): 1544-1550                                                                                                                         |  |  |   | X |  |   |  |   |  |  |  |  |  |  |  |
| Bambauer KZ, Aupont O, Stone PH, Locke SE, Mullan MG, et al. (2005) "The effect of a telephone counseling intervention on self-rated health of cardiac patients." . Psychosomatic Medicine 67(4): 539–545.                                                                                                            |  |  |   | X |  |   |  |   |  |  |  |  |  |  |  |
| Bazargani RH, Besharat MA, Ehsan HB, Nejatian M, Hosseini K (2011) The efficacy of Chronic Disease Self Management Programs and Tele-health on psychosocial adjustment by increasing self-efficacy in patients with CABG. Procedia - Social and Behavioral Sciences 30: 817–821.                                      |  |  |   | X |  |   |  |   |  |  |  |  |  |  |  |
| Beckie T (1989) A supportive-educative telephone program: Impact on knowledge and anxiety after coronary artery bypass graft surgery. Heart and Lung: Journal of Critical Care 18(1): 46–55.                                                                                                                          |  |  |   | X |  |   |  |   |  |  |  |  |  |  |  |
| Gallagher R, McKinley S, Dracup K (2003) Effects of a telephone counseling intervention on psychosocial adjustment in women following a cardiac event. Heart and Lung: Journal of Acute and Critical Care 32(2): 79–87.                                                                                               |  |  |   | X |  | X |  |   |  |  |  |  |  |  |  |
| Hanssen TA, Nordrehaug JE, Eide GE, Rokne B (2007) Improving outcomes after myocardial infarction: A randomized controlled trial evaluating effects of a telephone follow-up intervention. European Journal of Cardiovascular Prevention and Rehabilitation 14 (3): 429–437.                                          |  |  |   | X |  |   |  | X |  |  |  |  |  |  |  |
| Hanssen TA, Nordrehaug JE, Eide GE, Hanestad BR (2009) Does a telephone follow-up intervention for patients discharged with acute myocardial infarction have long-term effects on health-related quality of life? A randomised controlled trial. Journal of Clinical Nursing 18(9): 1334–1345.                        |  |  |   | X |  |   |  |   |  |  |  |  |  |  |  |
| Hartford K, Wong C, Zakaria D (2002) Randomized controlled trial of a telephone intervention by nurses to provide information and support to patients and their partners after elective coronary artery bypass graft surgery: Effects of anxiety. Heart and Lung: Journal of Acute and Critical Care, 31(3), 199–206. |  |  |   | X |  |   |  |   |  |  |  |  |  |  |  |
| Holmes-Rovner M, Stommel M, Corser WD, Olomu A, Holtrop JS, et al. (2008) Does outpatient telephone coaching add to hospital quality improvement following                                                                                                                                                            |  |  |   | X |  | X |  |   |  |  |  |  |  |  |  |

|                                                                                                                                                                                                                                                                                                                                                                                                                                                                 |  |  |  |   |  |   |  |  |   |  |  |  |  |  |  |
|-----------------------------------------------------------------------------------------------------------------------------------------------------------------------------------------------------------------------------------------------------------------------------------------------------------------------------------------------------------------------------------------------------------------------------------------------------------------|--|--|--|---|--|---|--|--|---|--|--|--|--|--|--|
| hospitalization for acute coronary syndrome? Journal of General Internal Medicine 23(9): 1464–70.                                                                                                                                                                                                                                                                                                                                                               |  |  |  |   |  |   |  |  |   |  |  |  |  |  |  |
| Ma Y, Ockene IS, Rosal MC, Merriam PA, Ockene JK, et al. (2010) Randomized trial of a pharmacist-delivered intervention for improving lipid-lowering medication adherence among patients with coronary heart disease. Cholesterol 2010: 1–11.                                                                                                                                                                                                                   |  |  |  | X |  |   |  |  |   |  |  |  |  |  |  |
| McLaughlin TJ, Aupont O, Bambauer K, Stone P, Mullan MG, et al. (2005) Improving psychologic adjustment to chronic illness in cardiac patients: The role of depression and anxiety. Journal of General Internal Medicine 20(12): 1084–1090.                                                                                                                                                                                                                     |  |  |  | X |  |   |  |  |   |  |  |  |  |  |  |
| Mittag O, China C, Hoberg E, Juers E, Kolenda K, et al. (2006) Outcomes of cardiac rehabilitation with versus without a follow-up intervention rendered by telephone (Luebeck follow-up trial): overall and gender-specific effects. International journal of rehabilitation research Internationale Zeitschrift für Rehabilitationsforschung. Revue internationale de recherches de readaptation 29(4): 295–302.                                               |  |  |  | X |  | X |  |  |   |  |  |  |  |  |  |
| Neubeck L, Redfern J, Briffa T, Ascanio R, Freedman SB, et al. (2009) Cardiovascular risk benefits of the CHOICE (Choice of Health Options In prevention of Cardiovascular Events) program are maintained for four years: Randomised controlled trial. European Heart Journal Conference: European Society of Cardiology, ESC Congress 2009 Barcelona Spain. Conference Start: 20090829 Conference End: 20090902. Conference Publication: (var.pagings) 30: 76. |  |  |  | X |  |   |  |  |   |  |  |  |  |  |  |
| Neubeck L, Freedman SB, Briffa T, Bauman A, Redfern J (2011) Four-year follow-up of the choice of health options in prevention of cardiovascular events randomized controlled trial. European Journal of Cardiovascular Prevention and Rehabilitation.18(2)278286                                                                                                                                                                                               |  |  |  | X |  |   |  |  |   |  |  |  |  |  |  |
| Redfern J, Briffa T, Ellis E, Freedman SB (2008) Patient-centered modular secondary prevention following acute coronary syndrome: A randomized controlled trial. Journal of Cardiopulmonary Rehabilitation and Prevention.28(2)107117                                                                                                                                                                                                                           |  |  |  | X |  |   |  |  |   |  |  |  |  |  |  |
| Redfern J, Briffa T, Ellis E, Freedman SB (2009) Choice of secondary prevention improves risk factors after acute coronary syndrome: 1-Year follow-up of the CHOICE (Choice of Health Options in prevention of Cardiovascular Events) randomised controlled trial. Heart 95 (6): 468–475.                                                                                                                                                                       |  |  |  | X |  |   |  |  |   |  |  |  |  |  |  |
| Redfern J, Menzies M, Briffa T, Freedman SB (2010) Impact of medical consultation frequency on modifiable risk factors and medications at 12 months after acute coronary syndrome in the CHOICE randomised controlled trial. International Journal of Cardiology 145 (3): 481–486.                                                                                                                                                                              |  |  |  | X |  |   |  |  |   |  |  |  |  |  |  |
| Reid RD, Pipe AL, Quinlan B, Oda J (2007) Interactive                                                                                                                                                                                                                                                                                                                                                                                                           |  |  |  | X |  |   |  |  | X |  |  |  |  |  |  |

|                                                                                                                                                                                                                                                                                                  |  |  |  |   |   |   |  |   |  |  |  |  |   |  |   |
|--------------------------------------------------------------------------------------------------------------------------------------------------------------------------------------------------------------------------------------------------------------------------------------------------|--|--|--|---|---|---|--|---|--|--|--|--|---|--|---|
| voice response telephony to promote smoking cessation in patients with heart disease: A pilot study. Patient Education and Counseling 66 (3): 319–326.                                                                                                                                           |  |  |  |   |   |   |  |   |  |  |  |  |   |  |   |
| Smith KM, Arthur HM, McKelvie RS, Kodis J (2004) Differences in sustainability of exercise and health-related quality of life outcomes following home or hospital-based cardiac rehabilitation. European Journal of Cardiovascular Prevention and Rehabilitation 11(4): 313–319.                 |  |  |  | X |   |   |  |   |  |  |  |  |   |  |   |
| Smith KM (2007) Sustainability of exercise capacity and quality of life after home or hospital based exercise training in low-risk patients following coronary artery bypass graft surgery: a six-year follow-up of a randomized controlled trial, McMaster University (Canada): 176 p–176 p.    |  |  |  | X |   |   |  |   |  |  |  |  |   |  |   |
| Smith KM, McKelvie RS, Thorpe KE, Arthur HM (2011) Six-year follow-up of a randomised controlled trial examining hospital versus home-based exercise training after coronary artery bypass graft surgery. Heart 97(14): 1169–1174.                                                               |  |  |  | X |   |   |  |   |  |  |  |  |   |  |   |
| Stevens B (1985) The effectiveness of patient education follow-up by telephone on knowledge of post-myocardial infarction patients. (M.Nus., University of Alberta (Canada)). ProQuest Dissertations and Theses (303461144).                                                                     |  |  |  | X |   |   |  |   |  |  |  |  |   |  |   |
| Tranmer JE, Parry MJE (2004) Enhancing postoperative recovery of cardiac surgery patients - A randomized clinical trial of an advanced practice nursing intervention. Western Journal of Nursing Research 26(5): 515–532.                                                                        |  |  |  | X |   |   |  |   |  |  |  |  |   |  |   |
| Vale MJ, Jelinek MV, Best JD, Dart AM, Grigg LE, et al. (2003) Coaching patients on achieving cardiovascular health (COACH): A multicenter randomized trial in patients with coronary heart disease. Archives of Internal Medicine—. 163(22)27752783                                             |  |  |  | X |   | X |  |   |  |  |  |  | X |  | X |
| Vale MJ, Jelinek MV, Best JD, Santamaria JD (2002) Coaching patients with coronary heart disease to achieve the target cholesterol: A method to bridge the gap between evidence-based medicine and the "real world" - randomized controlled trial. Journal of Clinical Epidemiology. 55(3)245252 |  |  |  | X |   |   |  |   |  |  |  |  |   |  | X |
| Clark NM, Janz NK, Becker MH, . Impact of self-management education on the functional health status of older adults with heart disease. The Gerontologist 1992; 32: 438–443.                                                                                                                     |  |  |  |   | X |   |  | X |  |  |  |  |   |  |   |
| Clark NM, Janz NK, Dodge JA, . Self-Management of heart disease by older adults. Res Aging 1997; 19: 362–382.                                                                                                                                                                                    |  |  |  |   | X |   |  |   |  |  |  |  |   |  |   |
| Clark NM, Janz NK, Dodge JA, . Changes in functional health status of older women with heart disease: evaluation of a program based on self-regulation. J                                                                                                                                        |  |  |  |   | X |   |  | X |  |  |  |  |   |  |   |

|                                                                                                                                                                                                                                                                                                                                                                                                                                    |  |  |  |  |   |  |  |   |  |  |  |  |  |  |   |
|------------------------------------------------------------------------------------------------------------------------------------------------------------------------------------------------------------------------------------------------------------------------------------------------------------------------------------------------------------------------------------------------------------------------------------|--|--|--|--|---|--|--|---|--|--|--|--|--|--|---|
| Gerontol B Psychol Sci Soc Sci 2000; 55B: S117–S126.                                                                                                                                                                                                                                                                                                                                                                               |  |  |  |  |   |  |  |   |  |  |  |  |  |  |   |
| Wheeler JR. Can a disease self-management programme reduce health care costs: the case of older women with heart disease. Med Care 2003; 41: 706–715                                                                                                                                                                                                                                                                               |  |  |  |  | X |  |  |   |  |  |  |  |  |  |   |
| Clark NM, Janz NK, Dodge JA, . Heart disease management by women: does intervention format matter? Health Educ Behav 2009; 36: 394–409                                                                                                                                                                                                                                                                                             |  |  |  |  | X |  |  | X |  |  |  |  |  |  |   |
| Cupples ME, McKnight A, O'Neill C, . The effect of personal health education on the quality of life of patients with angina in general practice. Health Educ J 1996; 55: 75–83                                                                                                                                                                                                                                                     |  |  |  |  | X |  |  |   |  |  |  |  |  |  |   |
| Cupples ME, McKnight A. Five year follow up of patients at high cardiovascular risk who took part in randomised controlled trial of health promotion. Brit Med J 1999; 319: 687–688.                                                                                                                                                                                                                                               |  |  |  |  | X |  |  | X |  |  |  |  |  |  | X |
| Cupples ME, McKnight A. Randomised controlled trial of health promotion in general practice for patients at high cardiovascular risk. Brit Med J 1994; 309: 993–996                                                                                                                                                                                                                                                                |  |  |  |  | X |  |  |   |  |  |  |  |  |  | X |
| O'Neill C, Normand C, Cupples M, . Cost effectiveness of personal health education in primary care for people with angina in the greater Belfast area of Northern Ireland. J Epidemiol Community Health 1996; 50: 538–540.                                                                                                                                                                                                         |  |  |  |  | X |  |  |   |  |  |  |  |  |  |   |
| Esposito D, Brown R, Chen A, . Impacts of a disease management program for dually eligible beneficiaries. Health Care Finan Rev 2008; 30: 27–45.                                                                                                                                                                                                                                                                                   |  |  |  |  | X |  |  | X |  |  |  |  |  |  |   |
| Hanssen TA, Nordrehaug JE, Eide BE, . Improving outcomes after myocardial infarction: a randomized controlled trial evaluating effects of a telephone follow-up intervention. Eur J Cardiovasc Prevent Rehab 2007; 14(3): 429–437.                                                                                                                                                                                                 |  |  |  |  | X |  |  |   |  |  |  |  |  |  |   |
| Hanssen TA, Nordrehaug JE, Eide GE, . Can telephone follow-up after discharge improve life style factors after a myocardial infarction? A randomized controlled trial. 7th Annual Cardiovascular Nursing Spring Meeting of the European Society of Cardiology Council on Cardiovascular Nursing and Allied Professions: changing practice to improve care Manchester, UK 23–24 March 2007. Eur J Cardiovasc Nurs 2007; 6: S43–S44. |  |  |  |  | X |  |  |   |  |  |  |  |  |  |   |
| Hanssen TA, Nordrehaug JE, Eide GE, . Does a telephone follow-up intervention for patients discharges with acute myocardial infarction have long-term effects on health-related quality of life? A randomised controlled trial. J Clin Nurs 2009; 18: 1334–1345                                                                                                                                                                    |  |  |  |  | X |  |  |   |  |  |  |  |  |  |   |
| Hanssen TA, Nordrehaug JE, Eide GE, . Evaluating the effect of a combined reactive and proactive telephone follow-up intervention after acute myocardial infarction. A randomized controlled trial. Eur J Cardiovasc Nurs 2006;                                                                                                                                                                                                    |  |  |  |  | X |  |  |   |  |  |  |  |  |  |   |

|                                                                                                                                                                                                                                                                              |  |  |  |  |   |   |  |   |  |  |  |  |  |  |   |
|------------------------------------------------------------------------------------------------------------------------------------------------------------------------------------------------------------------------------------------------------------------------------|--|--|--|--|---|---|--|---|--|--|--|--|--|--|---|
| 5: S46–S46.                                                                                                                                                                                                                                                                  |  |  |  |  |   |   |  |   |  |  |  |  |  |  |   |
| Lie I, Arnesen H, Sandvik L, . Health-related quality of life after coronary artery bypass grafting. The impact of a randomised controlled home-based intervention program. Qual Life Res 2009; 18: 201–207.                                                                 |  |  |  |  | X |   |  | X |  |  |  |  |  |  |   |
| Hofman-Bang C, Lisspers J, Nordlander R, . Two-year results of a controlled study of residential rehabilitation for patients treated with percutaneous transluminal coronary angioplasty. A randomized study of a multifactorial programme. Eur Heart J 1999; 20: 1465–1474. |  |  |  |  | X | X |  | X |  |  |  |  |  |  |   |
| Lisspers J, Sundin O, Hofman-Bang C, . Behavioural effects of a comprehensive, multifactorial program for lifestyle change after percutaneous transluminal coronary angioplasty: a prospective, randomized, controlled study. J Psychosom Res 1999; 46: 143–154.             |  |  |  |  | X |   |  |   |  |  |  |  |  |  |   |
| Lisspers J, Sundin O, Ohman A, . Long-term effects of lifestyle behavior change in coronary artery disease: effects on recurrent coronary events after percutaneous coronary intervention. Health Psychol 2005; 24: 41–48.                                                   |  |  |  |  | X |   |  |   |  |  |  |  |  |  |   |
| P.RE.COR. Group. Comparison of a rehabilitation programme, a counselling programme and usual care after an acute myocardial infarction: results of a long-term randomized trial. Eur Heart J 1991; 12: 612–616.                                                              |  |  |  |  | X |   |  | X |  |  |  |  |  |  | X |
| Brown R, Peikes D, Chen A, . 15-Site randomized trial of coordinated care in medicare FFS. Health Care Finan Rev 2008; 30: 5–25                                                                                                                                              |  |  |  |  | X |   |  | X |  |  |  |  |  |  |   |
| Peikes D, Chen A, Schore J, . Effects of care coordination on hospitalization, quality of care, and health care expenditures among medicare beneficiaries 15 randomized trials. J Amer Med Assoc 2009; 301: 603–618.                                                         |  |  |  |  | X |   |  |   |  |  |  |  |  |  |   |
| Pogosova GV, Kalinina AM, Spivak EI, . Efficacy of an educational preventive technology in patients with stable angina in ambulatory conditions. Kardiologiia 2008; 48(7): 4–9.                                                                                              |  |  |  |  | X |   |  | X |  |  |  |  |  |  |   |
| Tingstrom PR, Kamwendo K, Bergdahl B. Effects of a problem-based learning rehabilitation programme on quality of life in patients with coronary artery disease. Eur J Cardiovasc Nurs 2005; 4: 324–330                                                                       |  |  |  |  | X |   |  | X |  |  |  |  |  |  |   |
| Appels A, B, r F, van der PG, et al. Effects of treating exhaustion in angioplasty patients on new coronary events: results of the randomized Exhaustion Intervention Trial (EXIT). Psychosomatic Medicine. 2005;67(2):217-223.                                              |  |  |  |  |   | X |  |   |  |  |  |  |  |  |   |
| Ashton RC, Whitworth GC, Seldomridge JA, et al. The effects of self-hypnosis on quality of life following coronary artery bypass surgery: preliminary results of a prospective, randomized trial. Journal of Alternative and                                                 |  |  |  |  |   | X |  |   |  |  |  |  |  |  |   |

|                                                                                                                                                                                                                                                                                                                                |  |  |  |  |  |   |  |  |  |  |  |  |  |  |   |
|--------------------------------------------------------------------------------------------------------------------------------------------------------------------------------------------------------------------------------------------------------------------------------------------------------------------------------|--|--|--|--|--|---|--|--|--|--|--|--|--|--|---|
| Complementary Medicine 1995;1(3):285-290.                                                                                                                                                                                                                                                                                      |  |  |  |  |  |   |  |  |  |  |  |  |  |  |   |
| Barr Taylor CB, Houston-Miller N, Ahn DK, Haskell W, DeBusk RF. The effects of exercise training programs on psychosocial improvement in uncomplicated postmyocardial infarction patients. Journal of Psychosomatic Research. 1986;30(5):581-587.                                                                              |  |  |  |  |  | X |  |  |  |  |  |  |  |  |   |
| Berkman LF, Blumenthal J, Burg M, et al. Effects of treating depression and low perceived social support on clinical events after myocardial infarction: the Enhancing Recovery in Coronary Heart Disease Patients (ENRICHD) Randomized Trial. JAMA : the journal of the American Medical Association. 2003;289(23):3106-3116. |  |  |  |  |  | X |  |  |  |  |  |  |  |  |   |
| Blumenthal JA, Sherwood A, Babyak MA, et al. Effects of exercise and stress management training on markers of cardiovascular risk in patients with ischemic heart disease: a randomized controlled trial. JAMA : the journal of the American Medical Association. 2005;293(13):1626-1634.                                      |  |  |  |  |  | X |  |  |  |  |  |  |  |  |   |
| Brown MA, Munford AM, Munford PR. Behavior therapy of psychological distress in patients after myocardial infarction or coronary bypass. Journal of Cardiopulmonary Rehabilitation. 1993;13(3):201-210.                                                                                                                        |  |  |  |  |  | X |  |  |  |  |  |  |  |  |   |
| Burgess AW, Lerner DJ, D'Agostino RB, Vokonas PS, Hartman CR, Gaccione P. A randomized control trial of cardiac rehabilitation. Social Science & Medicine. 1987;24(4):359-370.                                                                                                                                                 |  |  |  |  |  | X |  |  |  |  |  |  |  |  |   |
| Claesson M, Birgander LS, Lindahl B, et al. Women's hearts-stress management for women with ischemic heart disease: explanatory analyses of a randomized controlled trial. Journal of Cardiopulmonary Rehabilitation. 2005;25(2):93-102.                                                                                       |  |  |  |  |  | X |  |  |  |  |  |  |  |  |   |
| de Klerk JE, du Plessis WF, Steyn HS, Botha M. Hypnotherapeutic ego strengthening with male South African coronary artery bypass patients. The American Journal of Clinical Hypnosis. 2004;47(2):79-92.                                                                                                                        |  |  |  |  |  | X |  |  |  |  |  |  |  |  |   |
| Dugmore LD, Tipson RJ, Phillips MH, et al. Changes in cardiorespiratory fitness, psychological wellbeing, quality of life, and vocational status following a 12 month cardiac exercise rehabilitation programme. Heart. 1999;81(4):359-366                                                                                     |  |  |  |  |  | X |  |  |  |  |  |  |  |  | X |
| Engblom E, Korpilahti K, H.,m.,l.,inen H, R"nnemaa T, Puukka P. Quality of life and return to work 5 years after coronary artery bypass surgery. Long-term results of cardiac rehabilitation. Journal of Cardiopulmonary Rehabilitation. 1997;17(1):29-36.                                                                     |  |  |  |  |  | X |  |  |  |  |  |  |  |  | X |
| Frasure-Smith N, Lesperance F, Prince RH, et al. Randomised trial of home-based psychosocial nursing intervention for patients recovering from myocardial infarction. Lancet. 1997;350(9076):473-479.                                                                                                                          |  |  |  |  |  | X |  |  |  |  |  |  |  |  | X |
| Freedland KE, Skala JA, Carney RM, et al. Treatment of depression after coronary artery bypass surgery: A randomized controlled trial. Archives of General Psychiatry. 2009;66(4):387-396.                                                                                                                                     |  |  |  |  |  | X |  |  |  |  |  |  |  |  |   |

|                                                                                                                                                                                                                                                                                                                                                      |  |  |  |  |  |   |  |  |  |  |   |  |  |  |   |
|------------------------------------------------------------------------------------------------------------------------------------------------------------------------------------------------------------------------------------------------------------------------------------------------------------------------------------------------------|--|--|--|--|--|---|--|--|--|--|---|--|--|--|---|
| Fridlund B, H"gstet B, Lidell E, Larsson PA. Recovery after myocardial infarction. Effects of a caring rehabilitation programme. Scandinavian Journal of Caring Sciences. 1991;5(1):23-32.                                                                                                                                                           |  |  |  |  |  | X |  |  |  |  |   |  |  |  | X |
| Frizelle DJ, Lewin RJ, Kaye G, et al. Cognitive-behavioural rehabilitation programme for patients with an implanted cardioverter defibrillator: a pilot study. British Journal of Health Psychology. 2004;9(3):381-392.                                                                                                                              |  |  |  |  |  | X |  |  |  |  |   |  |  |  |   |
| Furze G, Dumville JC, Miles JNV, Irvine K, Thompson DR, Lewin RJP. "Prehabilitation" prior to CABG surgery improves physical functioning and depression. International Journal of Cardiology. 2009;132:51-58.                                                                                                                                        |  |  |  |  |  | X |  |  |  |  |   |  |  |  |   |
| Goodman H, Parsons A, Davison J, et al. A randomised controlled trial to evaluate a nurse-led programme of support and lifestyle management for patients awaiting cardiac surgery 'Fit for surgery: Fit for life' study. European Journal of Cardiovascular Nursing. 2008;7(3):189-195.                                                              |  |  |  |  |  | X |  |  |  |  |   |  |  |  |   |
| Hughes AR, Mutrie N, Macintyre PD. Effect of an exercise consultation on maintenance of physical activity after completion of phase III exercise-based cardiac rehabilitation. European Journal of Cardiovascular Prevention and Rehabilitation 2007;14(1):114-121.                                                                                  |  |  |  |  |  | X |  |  |  |  |   |  |  |  |   |
| Johnston M, Foulkes J, Johnston DW, Pollard B, Gudmundsdottir H. Impact on patients and partners of inpatient and extended cardiac counseling and rehabilitation: a controlled trial. Psychosomatic Medicine. 1999;61(2):225-233.                                                                                                                    |  |  |  |  |  | X |  |  |  |  | X |  |  |  | X |
| Jones DA, West RR. Psychological rehabilitation after myocardial infarction: multicentre randomised controlled trial. BMJ (Clinical research ed.). 1996;313(7071):1517-1521.                                                                                                                                                                         |  |  |  |  |  | X |  |  |  |  |   |  |  |  | X |
| Karlsson MR, Edstr"m-Ploss C, Held C, Henriksson P, Billing E, Wall,n NH. Effects of expanded cardiac rehabilitation on psychosocial status in coronary artery disease with focus on type D characteristics. Journal of Behavioral Medicine. 2007;30(3):253-261.                                                                                     |  |  |  |  |  | X |  |  |  |  |   |  |  |  |   |
| Koertge J, Janszky I, Sundin O, et al. Effects of a stress management program on vital exhaustion and depression in women with coronary heart disease: a randomized controlled intervention study. Journal of Internal Medicine. 2008;263(3):281-293.                                                                                                |  |  |  |  |  | X |  |  |  |  |   |  |  |  |   |
| Leserman J, Stuart EM, Mamish ME, Benson H. The efficacy of the relaxation response in preparing for cardiac surgery. Behavioral Medicine. 1989;15(3):111-117.                                                                                                                                                                                       |  |  |  |  |  | X |  |  |  |  |   |  |  |  |   |
| Lesperance F, Frasure-Smith N, Koszycki D, et al. Effects of citalopram and interpersonal psychotherapy on depression in patients with coronary artery disease: the Canadian Cardiac Randomized Evaluation of Antidepressant and Psychotherapy Efficacy (CREATE) trial. JAMA : the journal of the American Medical Association. 2007;297(4):367-379. |  |  |  |  |  | X |  |  |  |  |   |  |  |  |   |
| Lewin B, Robertson IH, Cay EL, Irving JB, Campbell M.                                                                                                                                                                                                                                                                                                |  |  |  |  |  | X |  |  |  |  |   |  |  |  |   |

|                                                                                                                                                                                                                                                                                                             |  |  |  |  |  |   |  |  |  |   |   |  |   |  |   |
|-------------------------------------------------------------------------------------------------------------------------------------------------------------------------------------------------------------------------------------------------------------------------------------------------------------|--|--|--|--|--|---|--|--|--|---|---|--|---|--|---|
| Effects of self-help post-myocardial-infarction rehabilitation on psychological adjustment and use of health services. Lancet. 1992;339(8800):1036-1040.                                                                                                                                                    |  |  |  |  |  |   |  |  |  |   |   |  |   |  |   |
| Lewin RJ, Coulton S, Frizelle DJ, Kaye G, Cox H. A brief cognitive behavioural preimplantation and rehabilitation programme for patients receiving an implantable cardioverter-defibrillator improves physical health and reduces psychological morbidity and unplanned readmissions. Heart. 2009;95:63-69. |  |  |  |  |  | X |  |  |  |   |   |  |   |  |   |
| Lewin RJ, Furze G, Robinson J, et al. A randomised controlled trial of a self-management plan for patients with newly diagnosed angina. The British Journal of General Practice 2002;52(476):194-201.                                                                                                       |  |  |  |  |  | X |  |  |  | X |   |  |   |  |   |
| Lewin RJ, Thompson DR, Elton RA. Trial of the effects of an advice and relaxation tape given within the first 24 h of admission to hospital with acute myocardial infarction. International Journal of Cardiology. 2002;82(2):107-114.                                                                      |  |  |  |  |  | X |  |  |  |   | X |  | X |  |   |
| Lie I, Amesén H, Sandvik L, Hamilton G, Bunch EH. Effects of a home-based intervention program on anxiety and depression 6 months after coronary artery bypass grafting: a randomized controlled trial. Journal of Psychosomatic Research. 2007;62(4):411-418.                                              |  |  |  |  |  | X |  |  |  |   |   |  |   |  |   |
| Linden B. Evaluation of a home-based rehabilitation programme for patients recovering from acute myocardial infarction. Intensive & Critical Care Nursing 1995;11(1):10-19.                                                                                                                                 |  |  |  |  |  | X |  |  |  |   | X |  |   |  |   |
| McHugh F, Lindsay GM, Hanlon P, et al. Nurse led shared care for patients on the waiting list for coronary artery bypass surgery: a randomised controlled trial. Heart 2001;86(3):317-323.                                                                                                                  |  |  |  |  |  | X |  |  |  |   |   |  |   |  | X |
| McLaughlin TJ, Aupont O, Bambauer KZ, et al. Improving psychologic adjustment to chronic illness in cardiac patients. The role of depression and anxiety. Journal of General Internal Medicine 2005;20(12):1084-1090.                                                                                       |  |  |  |  |  | X |  |  |  |   |   |  |   |  |   |
| Michalsen A, Grossman P, Lehmann N, et al. Psychological and quality-of-life outcomes from a comprehensive stress reduction and lifestyle program in patients with coronary artery disease: results of a randomized trial. Psychotherapy and Psychosomatics. 2005;74(6):344-352.                            |  |  |  |  |  | X |  |  |  |   |   |  |   |  |   |
| Murchie P, Campbell NC, Ritchie LD, Deans HG, Thain J. Effects of secondary prevention clinics on health status in patients with coronary heart disease: 4 year follow-up of a randomized trial in primary care. Family Practice. 2004;21(5):567-574.                                                       |  |  |  |  |  | X |  |  |  |   |   |  |   |  | X |
| Newton M, Mutrie N, McArthur JD. The effects of exercise in a coronary rehabilitation programme. Scottish Medical Journal. 1991;36(2):38-41.                                                                                                                                                                |  |  |  |  |  | X |  |  |  |   |   |  |   |  |   |
| Oldridge N, Guyatt G, Jones N, et al. Effects on quality of life with comprehensive rehabilitation after acute myocardial infarction. The American Journal of Cardiology. 1991;67(13):1084-1089.                                                                                                            |  |  |  |  |  | X |  |  |  |   |   |  |   |  | X |
| Paul-Labrador M, Polk D, Dwyer JH, et al. Effects of a randomized controlled trial of transcendental meditation                                                                                                                                                                                             |  |  |  |  |  | X |  |  |  |   |   |  |   |  |   |

|                                                                                                                                                                                                                                                                                             |  |  |  |  |  |   |  |  |  |  |  |  |  |  |   |
|---------------------------------------------------------------------------------------------------------------------------------------------------------------------------------------------------------------------------------------------------------------------------------------------|--|--|--|--|--|---|--|--|--|--|--|--|--|--|---|
| on components of the metabolic syndrome in subjects with coronary heart disease. Archives of Internal Medicine. 2006;166(11):1218-1224.                                                                                                                                                     |  |  |  |  |  |   |  |  |  |  |  |  |  |  |   |
| Postlethwaite R, Stirling G, Peck CL. Stress inoculation for acute pain: a clinical trial. Journal of Behavioral Medicine. 1986;9(2):219-227.                                                                                                                                               |  |  |  |  |  | X |  |  |  |  |  |  |  |  |   |
| Scholz U, Knoll N, Sniehotta FF, Schwarzer R. Physical activity and depressive symptoms in cardiac rehabilitation: long-term effects of a self-management intervention. Social Science & Medicine 2006;62(12):3109-3120.                                                                    |  |  |  |  |  | X |  |  |  |  |  |  |  |  |   |
| Schrader G, Cheek F, Hordacre AL, Marker J, Wade V. Effect of psychiatry liaison with general practitioners on depression severity in recently hospitalised cardiac patients: a randomised controlled trial. The Medical Journal of Australia. 2005;182(6):272-276.                         |  |  |  |  |  | X |  |  |  |  |  |  |  |  |   |
| Sebregts EH, Falger PR, Appels A, Kester AD, B.,r FW. Psychological effects of a short behavior modification program in patients with acute myocardial infarction or coronary artery bypass grafting. A randomized controlled trial. Journal of Psychosomatic Research. 2005;58(5):417-424. |  |  |  |  |  | X |  |  |  |  |  |  |  |  |   |
| Seki E, Watanabe Y, Sunayama S, et al. Effects of phase III cardiac rehabilitation programs on health-related quality of life in elderly patients with coronary artery disease: Juntendo Cardiac Rehabilitation Program (J-CARP). Circulation Journal 2003;67(1):73-77.                     |  |  |  |  |  | X |  |  |  |  |  |  |  |  | X |
| Shuldham CM, Fleming S, Goodman H. The impact of pre-operative education on recovery following coronary artery bypass surgery. A randomized controlled clinical trial. European Heart Journal. 2002;23(8):666-674.                                                                          |  |  |  |  |  | X |  |  |  |  |  |  |  |  |   |
| Sneed NV, Finch NJ, Michel Y. The effect of psychosocial nursing intervention on the mood state of patients with implantable cardioverter defibrillators and their caregivers. Progress In Cardiovascular Nursing. 1997;12(2):4-14.                                                         |  |  |  |  |  | X |  |  |  |  |  |  |  |  |   |
| Sorlie T, Busund R, Sexton J, Sexton H, Sorlie D. Video information combined with individualized information sessions: Effects upon emotional well-being following coronary artery bypass surgery-A randomized trial. Patient Education & Counseling. 2007;65(2):180-188.                   |  |  |  |  |  | X |  |  |  |  |  |  |  |  |   |
| Stern MJ, Gorman PA, Kaslow L. The group counseling v exercise therapy study. A controlled intervention with subjects following myocardial infarction. Archives of Internal Medicine. 1983;143(9):1719-1725.                                                                                |  |  |  |  |  | X |  |  |  |  |  |  |  |  | X |
| Thompson DR, Meddis R. A prospective evaluation of in hospital counselling for first time myocardial infarction men. Journal of Psychosomatic Research. 1990;34(3):237-248.                                                                                                                 |  |  |  |  |  | X |  |  |  |  |  |  |  |  |   |
| Trzcieniecka-Green A, Steptoe A. The effects of stress management on the quality of life of patients following acute myocardial infarction or coronary bypass surgery. European Heart Journal. 1996;17(11):1663-1670.                                                                       |  |  |  |  |  | X |  |  |  |  |  |  |  |  |   |
| Uden AL, Schenck-Gustafsson K, Axelsson PO, Karlsson I, Orth-Gom, r K, Ydrefors AM. Positive effects of                                                                                                                                                                                     |  |  |  |  |  | X |  |  |  |  |  |  |  |  |   |

|                                                                                                                                                                                                                                                                                 |  |  |  |  |  |   |   |  |   |  |  |  |  |  |  |
|---------------------------------------------------------------------------------------------------------------------------------------------------------------------------------------------------------------------------------------------------------------------------------|--|--|--|--|--|---|---|--|---|--|--|--|--|--|--|
| increased nurse support for male patients after acute myocardial infarction. Quality of Life Research 1993;2(2):121-127.                                                                                                                                                        |  |  |  |  |  |   |   |  |   |  |  |  |  |  |  |
| Barth J. Depression as a Risk Factor for Mortality in Patients With Coronary Heart Disease: A Meta-analysis. 2004.                                                                                                                                                              |  |  |  |  |  | X |   |  |   |  |  |  |  |  |  |
| Merswolken M. Treating anxiety in patients with coronary heart disease: a randomized controlled trial. 2011.                                                                                                                                                                    |  |  |  |  |  | X |   |  |   |  |  |  |  |  |  |
| utwalli HA. Randomized controlled evaluation shows the effectiveness of a home-based cardiac rehabilitation program. 2012.                                                                                                                                                      |  |  |  |  |  | X |   |  |   |  |  |  |  |  |  |
| Oranta O. The outcomes of interpersonal counselling on depressive symptoms and distress after myocardial infarction. 2010.                                                                                                                                                      |  |  |  |  |  | X |   |  |   |  |  |  |  |  |  |
| Poortaghi S. General health improves with home-based cardiac rehabilitation program. 2011.                                                                                                                                                                                      |  |  |  |  |  | X |   |  |   |  |  |  |  |  |  |
| Utriyaiprasit K. Recovery after coronary artery bypass surgery: effect of an audiotape information programme. 2010.                                                                                                                                                             |  |  |  |  |  | X |   |  |   |  |  |  |  |  |  |
| Izawa KP, Watanabe S, Omiya K, et al.. Effect of the self-monitoring approach on exercise maintenance during cardiac rehabilitation: a randomized controlled trial. Am J Phys Med Rehabil. 2005;84:313–321.a                                                                    |  |  |  |  |  |   | X |  |   |  |  |  |  |  |  |
| Yates BC, Anderson T, Hertzog M, Ott C, Williams J. Effectiveness of follow-up booster sessions in improving physical status after cardiac rehabilitation: health, behavioral and clinical outcomes. App Nurs Res. 2005;18:59–62                                                |  |  |  |  |  |   | X |  |   |  |  |  |  |  |  |
| Hofman-Bang C, Lisspers J, Nordiander R, et al.. Two-year results of a controlled study of residential rehabilitation for patients treated with percutaneous transluminal coronary angioplasty: a randomized study of a multifactorial program. Eur Heart J. 1999;20:1465–1474. |  |  |  |  |  |   | X |  |   |  |  |  |  |  |  |
| Hsin-Hsin L, Yun-Fang T, Pyng-Jing L, Pei-Kwei T. Effects of a therapeutic lifestyle-change programme on cardiac risk factors after coronary artery bypass graft. J Clin Nurs. 2010;19:60–69.                                                                                   |  |  |  |  |  |   | X |  |   |  |  |  |  |  |  |
| Lewin B, Robertson IH, Cay EL, Irving JB, Campbell M. Effects of self-help post myocardial infarction rehabilitation on psychological adjustment and use of health services. Lancet. 1992;339:1036–1040.                                                                        |  |  |  |  |  |   | X |  |   |  |  |  |  |  |  |
| Lewin RJP, Furze G, Robinson J, Griffith K, Wiseman S, Boyle R. A randomized controlled trial of a self-management plan for patients with newly diagnosed angina. Br J Gen Pract. 2001;52:194–201.                                                                              |  |  |  |  |  |   | X |  |   |  |  |  |  |  |  |
| Bolman, C. Vries, de, H., Breukelen, van, G. Evaluation of nurse managed minimal contact smoking cessation intervention for cardiac patients Health Education Research 17 99–116 2002b.                                                                                         |  |  |  |  |  |   |   |  | X |  |  |  |  |  |  |

|                                                                                                                                                                                                                                                  |  |  |  |  |  |  |  |  |   |   |  |  |   |   |   |
|--------------------------------------------------------------------------------------------------------------------------------------------------------------------------------------------------------------------------------------------------|--|--|--|--|--|--|--|--|---|---|--|--|---|---|---|
| Burt, A., Thornley, P., Illingworth, D., White, P., Shaw, T. R., Turner, R. Stopping smoking after myocardial infarction Lancet 1 304–306 1974.                                                                                                  |  |  |  |  |  |  |  |  | X |   |  |  |   |   |   |
| Feeney, G., McPherson, A., Connor, J., McAlister, A., Young, M., Garrahy, P. Randomized controlled trial of two cigarette quit programmes in coronary care patients after acute myocardial infarction Internal Medicine Journal 31 470–475 2001. |  |  |  |  |  |  |  |  | X |   |  |  | X | X |   |
| Johnson, J. L., Budz, B., Mackay, M., Miller, M. Evaluation of a nurse-delivered smoking cessation intervention for hospitalized patients with cardiac disease Heart and Lung 28 55–64 1999.                                                     |  |  |  |  |  |  |  |  | X |   |  |  |   |   |   |
| Mohiuddin, S. M., Mooss, A. N., Hunter, C. B., Grollmes, T. L., Cloutier, D. A., Hilleman, D. E. Intensive smoking cessation intervention reduces mortality in high-risk smokers with cardiovascular disease Chest 131 446–452 2007.             |  |  |  |  |  |  |  |  | X |   |  |  |   |   |   |
| Ockene, J., Kristeller, J. L., Goldberg, R., Ockene, I., Merriam, P., Barrett, S. Smoking cessation and severity of disease: The coronary artery smoking cessation intervention study Health Psychology 11 119–126 1992.                         |  |  |  |  |  |  |  |  | X |   |  |  |   |   |   |
| Reid, R., Pipe, A., Higginson, L., Johnson, K., D'Angelo, M. S., Cooke, D., Dafoe, W. Stepped care approach to smoking cessation in patients hospitalized for coronary artery disease Journal of Cardiopulmonary Rehabilitation 23 176–182 2003. |  |  |  |  |  |  |  |  | X |   |  |  | X |   |   |
| Bamason S. & Zimmerman L. (1995) A comparison of patient teaching outcomes among postoperative coronary artery bypass graft (CABG) patients. Progress in Cardiovascular Nursing 10(4), 11–20.                                                    |  |  |  |  |  |  |  |  |   | X |  |  |   |   |   |
| Bengtsson K. (1983) Rehabilitation after myocardial infarction. A controlled study. Scandinavian Journal of Rehabilitation Medicine 15(1), 1–9.                                                                                                  |  |  |  |  |  |  |  |  |   | X |  |  |   |   | X |
| Bolman C., Brug J., Bär F., Martinali J. & Van Den Borne B. (2005) Long-term efficacy of a checklist to improve patient education in cardiology. Patient Education and Counseling 56, 240–248.                                                   |  |  |  |  |  |  |  |  |   | X |  |  |   |   |   |
| Cupples S.A. (1991) Effects of timing and reinforcement of preoperative education on knowledge and recovery of patients having coronary artery bypass graft surgery. Heart and Lung 20(6), 654–660.                                              |  |  |  |  |  |  |  |  |   | X |  |  |   |   |   |
| Furze G., Dumville J.C., Miles J.N.V., Irvine K., Thompson D.R. & Lewin R.J.P. (2009) "Prehabilitation" prior to CABG surgery improves physical functioning and depression. International Journal of Cardiology 132, 51–58.                      |  |  |  |  |  |  |  |  |   | X |  |  |   |   |   |
| Martinali J., Bolman C., Brug J., Van Den Borne B. & Bar F. (2001) A checklist to improve patient education in a cardiology outpatient setting. Patient Education and                                                                            |  |  |  |  |  |  |  |  |   | X |  |  |   |   |   |

|                                                                                                                                                                                                                                                                                                                                                                                            |  |  |  |  |  |  |  |  |  |   |   |  |  |  |  |
|--------------------------------------------------------------------------------------------------------------------------------------------------------------------------------------------------------------------------------------------------------------------------------------------------------------------------------------------------------------------------------------------|--|--|--|--|--|--|--|--|--|---|---|--|--|--|--|
| Counseling 42, 231–238.                                                                                                                                                                                                                                                                                                                                                                    |  |  |  |  |  |  |  |  |  |   |   |  |  |  |  |
| Petrie K.J., Cameron L.D., Ellis C.J., Buick D. & Weinman J. (2002) Changing illness perceptions after myocardial infarction: an early intervention randomized controlled trial. <i>Psychosomatic Medicine</i> 64, 580–586.                                                                                                                                                                |  |  |  |  |  |  |  |  |  | X |   |  |  |  |  |
| Pozen M.W., Stechmiller J.A., Harris W., Smith S., Fried D. & Voigt G.C. (1977) A nurse rehabilitator's impact on patients with myocardial infarction. <i>Medical Care</i> 15(10), 830–837.                                                                                                                                                                                                |  |  |  |  |  |  |  |  |  | X | X |  |  |  |  |
| Tullman D.F., Haugh K.H., Dracup K.A. & Bourguignon C. (2007) A randomized controlled trial to reduce delay in older adults seeking help for symptoms of acute myocardial infarction. <i>Research in Nursing &amp; Health</i> 30, 485–497.                                                                                                                                                 |  |  |  |  |  |  |  |  |  | X |   |  |  |  |  |
| Eagle KA, Montoyo CK, Riba AL, DeFranco AC, Parrish R, Skorcz S, Baker PL, Faul J, Jani SM, Chen B. Guideline-based standardized care is associated with substantially lower mortality in medicare patients with acute myocardial infarction: the American College of Cardiology's Guidelines Applied in Practice (GAP) projects in Michigan. <i>J Am Coll Cardiol.</i> 2005;46:1242–1248. |  |  |  |  |  |  |  |  |  |   | X |  |  |  |  |
| Fonarow GC, Gawlinski A, Moughrabi S, Tillisch JH. Improved treatment of coronary heart disease by implementation of a Cardiac Hospitalization Atherosclerosis Management Program (CHAMP). <i>Am J Cardiol.</i> 2001;87:819–822.                                                                                                                                                           |  |  |  |  |  |  |  |  |  |   | X |  |  |  |  |
| Oldenburg B, Perkins RJ, Andrews G. Controlled trial of psychological intervention in myocardial infarction. <i>J Consult Clin Psychol.</i> 1985;53:852–859                                                                                                                                                                                                                                |  |  |  |  |  |  |  |  |  |   | X |  |  |  |  |
| Hedback B, Perk J. 5-year results of a comprehensive rehabilitation programme after myocardial infarction. <i>Eur Heart J.</i> 1987;8:234–242                                                                                                                                                                                                                                              |  |  |  |  |  |  |  |  |  |   | X |  |  |  |  |
| Maeland JG, Havik OE. The effects of an in-hospital educational programme for myocardial infarction patients. <i>Scand J Rehabil Med.</i> 1987;19:57–65.                                                                                                                                                                                                                                   |  |  |  |  |  |  |  |  |  |   | X |  |  |  |  |
| Fletcher V. An individualized teaching programme following primary uncomplicated myocardial infarction. <i>J Adv Nurs.</i> 1987;12:195–200                                                                                                                                                                                                                                                 |  |  |  |  |  |  |  |  |  |   | X |  |  |  |  |
| Thompson DR. A randomized controlled trial of in-hospital nursing support for first time myocardial infarction patients and their partners: effects on anxiety and depression. <i>J Adv Nurs.</i> 1989;14:291–297.                                                                                                                                                                         |  |  |  |  |  |  |  |  |  |   | X |  |  |  |  |
| Fridlund B, Hogstedt B, Lidell E, Larsson PA. Recovery after myocardial infarction: effects of a caring rehabilitation programme. <i>Scand J Caring Sci.</i> 1991;5:23–32.                                                                                                                                                                                                                 |  |  |  |  |  |  |  |  |  |   | X |  |  |  |  |

|                                                                                                                                                                                                                                                                                                                          |  |  |  |  |  |  |  |  |  |  |   |  |   |  |  |
|--------------------------------------------------------------------------------------------------------------------------------------------------------------------------------------------------------------------------------------------------------------------------------------------------------------------------|--|--|--|--|--|--|--|--|--|--|---|--|---|--|--|
| Nordmann A, Heilmbauer I, Walker T, Martina B, Battegay E. A case-management program of medium intensity does not improve cardiovascular risk factor control in coronary artery disease patients: the Heartcare I Trial. Am J Med. 2001;110:543–550.                                                                     |  |  |  |  |  |  |  |  |  |  | X |  |   |  |  |
| Jeong HS, Chae JS, Moon JS, Yoo YS. An individualized teaching program for atherosclerotic risk factor reduction in patients with myocardial infarction. Yonsei Med J. 2002;43:93–100.                                                                                                                                   |  |  |  |  |  |  |  |  |  |  | X |  |   |  |  |
| Echeverry D, Dike M, Jovanovic L, Wollitzer AO, Westphal S, Mudaliar S, Washington C, Davidson MB. Efforts to improve subsequent treatment of cardiovascular risk factors in older patients with diabetes hospitalized for a cardiac event. Am J Manag Care. 2005;11:758–764.                                            |  |  |  |  |  |  |  |  |  |  | X |  | X |  |  |
| Scalzi CC, Burke LE, Greenland S. Evaluation of an inpatient educational program for coronary patients and families. Heart Lung. 1980;9:846–853.                                                                                                                                                                         |  |  |  |  |  |  |  |  |  |  | X |  |   |  |  |
| Kushnir B, Fox K, Tomlinson I, Aber CP. The effect of a pre-discharge consultation on the resumption of work, sexual activity, and driving following acute myocardial infarction. Scand J Rehabil Med. 1976;8:155–159.                                                                                                   |  |  |  |  |  |  |  |  |  |  | X |  |   |  |  |
| Young DT, Kottke TE, McCall MM, Blume D. A prospective controlled study of in-hospital myocardial infarction rehabilitation. J Card Rehabil. 1982;2:32–40.                                                                                                                                                               |  |  |  |  |  |  |  |  |  |  | X |  |   |  |  |
| Holmboe ES, Meehan TP, Radford MJ, Wang Y, Marciniak TA, Krumholz HM. Use of critical pathways to improve the care of patients with acute myocardial infarction. Am J Med. 1999;107:324–331.                                                                                                                             |  |  |  |  |  |  |  |  |  |  | X |  |   |  |  |
| Kucenic MJ, Meyers DG. Impact of a clinical pathway on the care and costs of myocardial infarction. Angiology. 2000;51:393–404.                                                                                                                                                                                          |  |  |  |  |  |  |  |  |  |  | X |  |   |  |  |
| Cheah J. Clinical pathways: an evaluation of its impact on the quality of care in an acute care general hospital in Singapore. Singapore Med J. 2000;41:335–346.                                                                                                                                                         |  |  |  |  |  |  |  |  |  |  | X |  |   |  |  |
| Hickey A, Scott I, Denaro C, Stewart N, Bennett C, Theile T. Using clinical indicators in a quality improvement programme targeting cardiac care. Int J Qual Health Care. 2004;16:i11–i25.                                                                                                                               |  |  |  |  |  |  |  |  |  |  | X |  |   |  |  |
| Scott IA, Denaro CP, Hickey AC, Bennett C, Mudge AM, Sanders DC, Thiele J, Flores JL. Optimising care of acute coronary syndromes in three Australian hospitals. Int J Qual Health Care. 2004;16:275–284.                                                                                                                |  |  |  |  |  |  |  |  |  |  | X |  |   |  |  |
| Lappe JM, Muhlestein JB, Lappe DL, Badger RS, Bair TL, Brockman R, French TK, Hofmann LC, Horne BD, Kralick-Goldberg S, Nicponski N, Orton JA, Pearson RR, Renlund DG, Rimmasch H, Roberts C, Anderson JL. Improvements in 1-year cardiovascular clinical outcomes associated with a hospital-based discharge medication |  |  |  |  |  |  |  |  |  |  | X |  |   |  |  |

|                                                                                                                                                                                                                                                                                       |  |  |  |  |  |  |  |  |  |  |  |  |   |  |   |
|---------------------------------------------------------------------------------------------------------------------------------------------------------------------------------------------------------------------------------------------------------------------------------------|--|--|--|--|--|--|--|--|--|--|--|--|---|--|---|
| program. Ann Intern Med. 2004;141:446–453.                                                                                                                                                                                                                                            |  |  |  |  |  |  |  |  |  |  |  |  |   |  |   |
| Grace C, Summerbell C. Does provision of additional dietary information affect actual or only reported compliance to a low-fat diet over 12 weeks in hyperlipidaemic individuals? Report of a pilot study. J Hum Nutr Diet 1996; 9: 303–7.                                            |  |  |  |  |  |  |  |  |  |  |  |  | X |  |   |
| Dalgård C, Thure A, Haastrup B, Haghfelt T, Stender S. Saturated fat intake is reduced in patients with ischemic heart disease 1 year after comprehensive counseling but not after brief counseling. J Am Diet Assoc 2001; 101: 1420–9.                                               |  |  |  |  |  |  |  |  |  |  |  |  | X |  |   |
| Levetan CS, Dawn KR, Murray JF, Popma JJ, Ratner RE, Robbins DC. Impact of computer-generated personalized goals on cholesterol lowering. Value Health 2005; 8: 639–46.                                                                                                               |  |  |  |  |  |  |  |  |  |  |  |  | X |  |   |
| Bolman CVH, van Breukelen G. Evaluation of a nurse-managed minimal-contact smoking cessation intervention for cardiac inpatients. Health Educ Res 2002; 17: 99–116.                                                                                                                   |  |  |  |  |  |  |  |  |  |  |  |  | X |  |   |
| Sivarajan Froelicher ESS, Miller NH, Christoperson DJ et al. High rates of sustained smoking cessation in women hospitalized with cardiovascular disease: the Women's Initiative for Nonsmoking(WINS). Circulation 2004; 109: 587–93                                                  |  |  |  |  |  |  |  |  |  |  |  |  | X |  |   |
| Feder G, Griffiths C, Eldridge S, Spence M. Effect of postal prompts to patients and general practitioners on the quality of primary care after a coronary event (POST): randomised controlled trial. Br Med J 1999; 318: 1522.                                                       |  |  |  |  |  |  |  |  |  |  |  |  | X |  |   |
| Mahler HI, Kulik JA, Tarazi RY. Effects of a videotape information intervention at discharge on diet and exercise compliance after coronary bypass surgery. J Cardiopulm Rehabil 1999; 19:170–7.                                                                                      |  |  |  |  |  |  |  |  |  |  |  |  | X |  |   |
| Allen JK: Coronary risk factor modification in woman after coronary artery by pass surgery.Nursing Research. 1996,45:260–265.                                                                                                                                                         |  |  |  |  |  |  |  |  |  |  |  |  |   |  | X |
| Carlsson R, Lindberg G, Westin L, Israelsson B: Influence of coronary nursing management follow up on lifestyle after acute myocardial infarction.Heart. 1997,77:256–259.                                                                                                             |  |  |  |  |  |  |  |  |  |  |  |  |   |  | X |
| DeBusk RF, Miller N, Superko HR, et al.: Acase-management system for coronary risk factor modification after acute myocardial infarction.Annals of Internal Medicine. 1994,120:721–729.                                                                                               |  |  |  |  |  |  |  |  |  |  |  |  |   |  | X |
| Lisspers J, Sundin O, Hofman-Bang C, et al.: Behavioral effects of a comprehensive, multifactorial program for lifestyle change after percutaneous transluminal coronary angioplasty: A prospective, randomized, controlled study.Journal of Psychosomatic Research. 1999,46:143–154. |  |  |  |  |  |  |  |  |  |  |  |  |   |  | X |
| Mitsibounas DN, Tsouna-Hadjis ED, Sideris DA, Rotas                                                                                                                                                                                                                                   |  |  |  |  |  |  |  |  |  |  |  |  |   |  | X |

|                                                                                                                                                                                                                                              |  |  |  |  |  |  |  |  |  |  |  |  |  |   |
|----------------------------------------------------------------------------------------------------------------------------------------------------------------------------------------------------------------------------------------------|--|--|--|--|--|--|--|--|--|--|--|--|--|---|
| AR: Effects of group psychosocial intervention on coronary risk factors. Psychotherapy and Psychosomatics. 1992;58:97-102.                                                                                                                   |  |  |  |  |  |  |  |  |  |  |  |  |  |   |
| Campbell NC, Thain J, Deans HG, Ritchie LD, Rawles JM, Squair JL. Secondary prevention clinics for coronary heart disease: randomised trial of effect on health. BMJ. 1998;316:1434-7.                                                       |  |  |  |  |  |  |  |  |  |  |  |  |  | X |
| Campbell NC, Ritchie LD, Thain J, Deans HG, Rawles JM, Squair JL. Secondary prevention in coronary heart disease: a randomised trial of nurse led clinics in primary care. Heart. 1998;80:447-52                                             |  |  |  |  |  |  |  |  |  |  |  |  |  | X |
| Engblom E, Rönnemaa T, Hämäläinen H, Kallio V, Vanttinen E, Knuts LR. Coronary heart disease risk factors before and after bypass surgery: results of a controlled trial on multifactorial rehabilitation. Eur Heart J. 1992;13:232-7.       |  |  |  |  |  |  |  |  |  |  |  |  |  | X |
| Taylor CB, Miller NH, Smith PM, DeBusk RF. The effect of a home-based, case-managed, multifactorial risk-reduction program on reducing psychological distress in patients with cardiovascular disease. J Cardiopulm Rehabil. 1997;17:157-62. |  |  |  |  |  |  |  |  |  |  |  |  |  | X |
| Murchie P, Campbell NC, Ritchie LD, Simpson JA, Thain J. Secondary prevention clinics for coronary heart disease: four year follow up of a randomised controlled trial in primary care. BMJ. 2003;326:84                                     |  |  |  |  |  |  |  |  |  |  |  |  |  | X |
| Schuler G, Hambrecht R, Schlierf G, Niebauer J, Hauer K, Neumann J, et al. Regular physical exercise and low-fat diet. Effects on progression of coronary artery disease. Circulation. 1992;86:1-11.a                                        |  |  |  |  |  |  |  |  |  |  |  |  |  | X |
| Niebauer J, Hambrecht R, Velich T, Hauer K, Marburger C, Kälberer B, et al. Attenuated progression of coronary artery disease after 6 years of multifactorial risk intervention: role of physical exercise. Circulation. 1997;96:2534-41.    |  |  |  |  |  |  |  |  |  |  |  |  |  | X |
| Ornish D, Brown SE, Scherwitz LW, Billings JH, Armstrong WT, Ports TA, et al. Can lifestyle changes reverse coronary heart disease? The Lifestyle Heart Trial. Lancet. 1990;336:129-33                                                       |  |  |  |  |  |  |  |  |  |  |  |  |  | X |
| Ornish D, Scherwitz LW, Billings JH, Brown SE, Gould KL, Merritt TA, et al. Intensive lifestyle changes for reversal of coronary heart disease. JAMA. 1998;280:2001-7.                                                                       |  |  |  |  |  |  |  |  |  |  |  |  |  | X |
| Naylor MD, Brooten D, Campbell R, Jacobsen BS, Mezey MD, Pauly MV, et al. Comprehensive discharge planning and home follow-up of hospitalized elders: a randomized clinical trial. JAMA. 1999;281:613-20.                                    |  |  |  |  |  |  |  |  |  |  |  |  |  | X |
| Naylor MD, McCauley KM. The effects of a discharge planning and home follow-up intervention on elders hospitalized with common medical and surgical cardiac conditions. J Cardiovasc Nurs. 1999;14:44-54.                                    |  |  |  |  |  |  |  |  |  |  |  |  |  | X |
| Dorossiev D. Rehabilitation and Comprehensive Secondary Prevention after Acute Myocardial Infarction. Report on a Study. EURO Reports and Studies No. 84. Copenhagen: World Health Organization; 1983.                                       |  |  |  |  |  |  |  |  |  |  |  |  |  | X |

|                                                                                                                                                                                                                                                                                               |  |  |  |  |  |  |  |  |  |  |  |  |  |  |   |
|-----------------------------------------------------------------------------------------------------------------------------------------------------------------------------------------------------------------------------------------------------------------------------------------------|--|--|--|--|--|--|--|--|--|--|--|--|--|--|---|
| Kallio V, Hämäläinen H, Hakkila J, Luurila OJ. Reduction in sudden deaths by a multifactorial intervention programme after acute myocardial infarction. <i>Lancet</i> . 1979;2:1091-4                                                                                                         |  |  |  |  |  |  |  |  |  |  |  |  |  |  | X |
| Hämäläinen H, Luurila OJ, Kallio V, Knuts LR, Arstila M, Hakkila J. Long-term reduction in sudden deaths after a multifactorial intervention programme in patients with myocardial infarction: 10-year results of a controlled investigation. <i>Eur Heart J</i> . 1989;10:55-62              |  |  |  |  |  |  |  |  |  |  |  |  |  |  | X |
| Hämäläinen H, Luurila OJ, Kallio V, Knuts LR. Reduction in sudden deaths and coronary mortality in myocardial infarction patients after rehabilitation. 15 year follow-up study. <i>Eur Heart J</i> . 1995;16:1839-44.                                                                        |  |  |  |  |  |  |  |  |  |  |  |  |  |  | X |
| Sivarajan ES, Bruce RA, Lindskog BD, Almes MJ, Belanger L, Green B. Treadmill test responses to an early exercise program after myocardial infarction: a randomized study. <i>Circulation</i> . 1982;65:1420-8.                                                                               |  |  |  |  |  |  |  |  |  |  |  |  |  |  | X |
| Vermeulen A, Lie KI, Durrer D. Effects of cardiac rehabilitation after myocardial infarction: changes in coronary risk factors and long-term prognosis. <i>Am Heart J</i> . 1983;105:798-801                                                                                                  |  |  |  |  |  |  |  |  |  |  |  |  |  |  | X |
| Bell JM. A Comparison of a Multi-Disciplinary Home Based Cardiac Rehabilitation Programme with Comprehensive Conventional Rehabilitation in Post-Myocardial Infarction Patients [PhD thesis]. London: University of London; 1998.                                                             |  |  |  |  |  |  |  |  |  |  |  |  |  |  | X |
| Toobert DJ, Glasgow RE, Radcliffe JL. Physiologic and related behavioral outcomes from the Women's Lifestyle Heart Trial. <i>Ann Behav Med</i> . 2000;22:1-9.                                                                                                                                 |  |  |  |  |  |  |  |  |  |  |  |  |  |  | X |
| Sundin O, Lisspers J, Hofman-Bang C, Nygren A, Rydén L, Ohman A. Comparing multifactorial lifestyle interventions and stress management in coronary risk reduction. <i>Int J Behav Med</i> . 2003;10:191-204.                                                                                 |  |  |  |  |  |  |  |  |  |  |  |  |  |  | X |
| Yu CM, Li LS, Ho HH, Lau CP. Long-term changes in exercise capacity, quality of life, body anthropometry, and lipid profiles after a cardiac rehabilitation program in obese patients with coronary heart disease. <i>Am J Cardiol</i> . 2003;91:321-5.                                       |  |  |  |  |  |  |  |  |  |  |  |  |  |  | X |
| Marchionni N, Fattiroli F, Fumagalli S, Oldridge N, Del Lungo F, Morosi L, et al. Improved exercise tolerance and quality of life with cardiac rehabilitation of older patients after myocardial infarction: results of a randomized, controlled trial. <i>Circulation</i> . 2003;107:2201-6. |  |  |  |  |  |  |  |  |  |  |  |  |  |  | X |
| Masley S, Phillips S, Copeland JR. Group office visits change dietary habits of patients with coronary artery disease—the dietary intervention and evaluation trial (D.I.E.T.). <i>J Fam Pract</i> . 2001;50:235-9.                                                                           |  |  |  |  |  |  |  |  |  |  |  |  |  |  | X |
| Ornish D, Scherwitz LW, Doody RS, Kesten D, McLanahan SM, Brown SE, et al. Effects of stress management training and dietary changes in treating ischemic heart disease. <i>JAMA</i> . 1983;249:54-9.                                                                                         |  |  |  |  |  |  |  |  |  |  |  |  |  |  | X |
| Fitzgerald JF, Smith DM, Martin DK, Freedman JA, Katz                                                                                                                                                                                                                                         |  |  |  |  |  |  |  |  |  |  |  |  |  |  | X |

|                                                                                                                                                                                                                                                                                                                       |  |  |  |  |  |  |  |  |  |  |  |  |  |  |   |
|-----------------------------------------------------------------------------------------------------------------------------------------------------------------------------------------------------------------------------------------------------------------------------------------------------------------------|--|--|--|--|--|--|--|--|--|--|--|--|--|--|---|
| BP. A case manager intervention to reduce readmissions. Arch Intern Med. 1994;154:1721-9.                                                                                                                                                                                                                             |  |  |  |  |  |  |  |  |  |  |  |  |  |  |   |
| Naylor M, Brooten D, Jones R, Lavizzo-Mourey R, Mezey M, Pauly M. Comprehensive discharge planning for the hospitalized elderly. A randomized clinical trial. Ann Intern Med. 1994;120:999-1006                                                                                                                       |  |  |  |  |  |  |  |  |  |  |  |  |  |  | X |
| Carlsson R. Serum cholesterol, lifestyle, working capacity and quality of life in patients with coronary artery disease. Experiences from a hospital-based secondary prevention programme. Scand Cardiovasc J Suppl. 1998;50:1-20                                                                                     |  |  |  |  |  |  |  |  |  |  |  |  |  |  | X |
| Jolly K, Bradley F, Sharp S, Smith H, Thompson S, Kinmonth AL, et al. Randomised controlled trial of follow up care in general practice of patients with myocardial infarction and angina: final results of the Southampton heart integrated care project (SHIP). The SHIP Collaborative Group. BMJ. 1999;318:706-11. |  |  |  |  |  |  |  |  |  |  |  |  |  |  | X |
| Allison TG, Farkouh ME, Smars PA, Evans RW, Squires RW, Gabriel SE, et al. Management of coronary risk factors by registered nurses versus usual care in patients with unstable angina pectoris (a chest pain evaluation in the emergency room [CHEER] substudy). Am J Cardiol. 2000;86:133-8                         |  |  |  |  |  |  |  |  |  |  |  |  |  |  | X |
| Moher M, Yudkin P, Wright L, Turner R, Fuller A, Schofield T, et al. Cluster randomised controlled trial to compare three methods of promoting secondary prevention of coronary heart disease in primary care. BMJ. 2001;322:1338.                                                                                    |  |  |  |  |  |  |  |  |  |  |  |  |  |  | X |
| Higgins HC, Hayes RL, McKenna KT. Rehabilitation outcomes following percutaneous coronary interventions (PCI). Patient Educ Couns. 2001;43:219-30.                                                                                                                                                                    |  |  |  |  |  |  |  |  |  |  |  |  |  |  | X |
| Allen JK, Blumenthal RS, Margolis S, Young DR, Miller ER 3rd, Kelly K. Nurse case management of hypercholesterolemia in patients with coronary heart disease: results of a randomized clinical trial. Am Heart J. 2002;144:678-86                                                                                     |  |  |  |  |  |  |  |  |  |  |  |  |  |  | X |
| Lear SA, Ignaszewski A, Linden W, Brozic A, Kiess M, Spinelli JJ, et al. The Extensive Lifestyle Management Intervention (ELMI) following cardiac rehabilitation trial. Eur Heart J. 2003;24:1920-7.                                                                                                                  |  |  |  |  |  |  |  |  |  |  |  |  |  |  | X |
| Young W, Rewa G, Goodman SG, Jaglal SB, Cash L, Lefkowitz C, et al. Evaluation of a community-based inner-city disease management program for postmyocardial infarction patients: a randomized controlled trial. CMAJ. 2003;169:905-10.                                                                               |  |  |  |  |  |  |  |  |  |  |  |  |  |  | X |
| Lichtman JH, Amatruda J, Yaari S, Cheng S, Smith GL, Mattera JA, et al. Clinical trial of an educational intervention to achieve recommended cholesterol levels in patients with coronary artery disease. Am Heart J. 2004;147:522-8.                                                                                 |  |  |  |  |  |  |  |  |  |  |  |  |  |  | X |
| Haskell WL, Alderman EL, Fair JM, Maron DJ, Mackey SF, Superko HR, et al. Effects of intensive multiple risk factor reduction on coronary atherosclerosis and clinical cardiac events in men and women with coronary artery disease. The Stanford Coronary Risk Intervention Project                                  |  |  |  |  |  |  |  |  |  |  |  |  |  |  | X |

|                                                                                                                                                                                                                                                                |  |  |  |  |  |  |  |  |  |  |  |  |  |  |   |
|----------------------------------------------------------------------------------------------------------------------------------------------------------------------------------------------------------------------------------------------------------------|--|--|--|--|--|--|--|--|--|--|--|--|--|--|---|
| (SCRIP). Circulation. 1994;89:975-90.                                                                                                                                                                                                                          |  |  |  |  |  |  |  |  |  |  |  |  |  |  |   |
| Allison TG, Squires RW, Johnson BD, Gau GT. Achieving National Cholesterol Education Program goals for low-density lipoprotein cholesterol in cardiac patients: importance of diet, exercise, weight control, and drug therapy. Mayo Clin Proc. 1999;74:466-73 |  |  |  |  |  |  |  |  |  |  |  |  |  |  | X |
| Stagmo M, Westin L, Carlsson R, Israelsson B. Long-term effects on cholesterol levels and the utilization of lipid-lowering drugs of a hospital-based programme for secondary prevention of coronary artery disease. J Cardiovasc Risk. 2001;8:243-8.          |  |  |  |  |  |  |  |  |  |  |  |  |  |  | X |
| Wilhelmsen L, Sanne H, Elmfeldt D, Grimby G, Tibblin G, Wedel H. A controlled trial of physical training after myocardial infarction. Effects on risk factors, nonfatal reinfarction, and death. Prev Med. 1975;4:491-508.                                     |  |  |  |  |  |  |  |  |  |  |  |  |  |  | X |
| Shaw LW. Effects of a prescribed supervised exercise program on mortality and cardiovascular morbidity in patients after myocardial infarction. The National Exercise and Heart Disease Project. Am J Cardiol. 1981;48:39-46                                   |  |  |  |  |  |  |  |  |  |  |  |  |  |  | X |
| Carson P, Phillips R, Lloyd M, Tucker H, Neophytou M, Buch NJ, et al. Exercise after myocardial infarction: a controlled trial. J R Coll Physicians Lond. 1982;16:147-51.                                                                                      |  |  |  |  |  |  |  |  |  |  |  |  |  |  | X |
| Ballantyne FC, Clark RS, Simpson HS, Ballantyne D. The effect of moderate physical exercise on the plasma lipoprotein subfractions of male survivors of myocardial infarction. Circulation. 1982;65:913-8.                                                     |  |  |  |  |  |  |  |  |  |  |  |  |  |  | X |
| Miller NH, Haskell WL, Berra K, DeBusk RF. Home versus group exercise training for increasing functional capacity after myocardial infarction. Circulation. 1984;70:645-9.                                                                                     |  |  |  |  |  |  |  |  |  |  |  |  |  |  | X |
| Roviaro S, Holmes DS, Holmsten RD. Influence of a cardiac rehabilitation program on the cardiovascular, psychological, and social functioning of cardiac patients. J Behav Med. 1984;7:61-81.                                                                  |  |  |  |  |  |  |  |  |  |  |  |  |  |  | X |
| Erdman RA, Duivenvoorden HJ, Verhage F, Kazemier M, Hugenholtz PG. Predictability of beneficial effects in cardiac rehabilitation: a randomized clinical trial of psychosocial variables. J Cardiopulm Rehabil. 1986;6:206-13.                                 |  |  |  |  |  |  |  |  |  |  |  |  |  |  | X |
| Agren B, Olin C, Castenfors J, Nilsson-Ehle P. Improvements of the lipoprotein profile after coronary bypass surgery: additional effects of an exercise training program. Eur Heart J. 1989;10:451-8.                                                          |  |  |  |  |  |  |  |  |  |  |  |  |  |  | X |
| Bethell HJ, Mullee MA. A controlled trial of community based coronary rehabilitation. Br Heart J. 1990;64:370-5                                                                                                                                                |  |  |  |  |  |  |  |  |  |  |  |  |  |  | X |
| Bertie J, King A, Reed N, Marshall AJ, Ricketts C. Benefits and weaknesses of a cardiac rehabilitation programme. J R Coll Physicians Lond. 1992;26:147-51.                                                                                                    |  |  |  |  |  |  |  |  |  |  |  |  |  |  | X |
| Fletcher BJ, Dunbar SB, Felner JM, Jensen BE, Almon L, Cotsonis G, et al. Exercise testing and training in physically disabled men with clinical evidence of coronary artery disease. Am J Cardiol. 1994;73:170-4                                              |  |  |  |  |  |  |  |  |  |  |  |  |  |  | X |
| Holmbäck AM, Säwe U, Fagher B. Training after myocardial infarction: lack of long-term effects on physical capacity and psychological variables. Arch Phys Med                                                                                                 |  |  |  |  |  |  |  |  |  |  |  |  |  |  | X |

|                                                                                                                                                                                                                                                                   |    |    |    |    |    |    |   |    |    |    |    |    |    |    |    |
|-------------------------------------------------------------------------------------------------------------------------------------------------------------------------------------------------------------------------------------------------------------------|----|----|----|----|----|----|---|----|----|----|----|----|----|----|----|
| Rehabil. 1994;75:551-4.                                                                                                                                                                                                                                           |    |    |    |    |    |    |   |    |    |    |    |    |    |    |    |
| Wosomu D, Bedford D, Ballantyne D. A comparison of the effects of strength and aerobic exercise training on exercise capacity and lipids after coronary artery bypass surgery. Eur Heart J. 1996;17:854-63.                                                       |    |    |    |    |    |    |   |    |    |    |    |    |    |    | X  |
| Heldal M, Sire S, Dale J. Randomised training after myocardial infarction: short and long-term effects of exercise training after myocardial infarction in patients on beta-blocker treatment. A randomized, controlled study. Scand Cardiovasc J. 2000;34:59-64. |    |    |    |    |    |    |   |    |    |    |    |    |    |    | X  |
| Ståhle A, Lindquist I, Mattsson E. Important factors for physical activity among elderly patients one year after an acute myocardial infarction. Scand J Rehabil Med. 2000;32:111-6.                                                                              |    |    |    |    |    |    |   |    |    |    |    |    |    |    | X  |
| Belardinelli R, Paolini I, Cianci G, Piva R, Georgiou D, Purcaro A. Exercise training intervention after coronary angioplasty: the ETICA trial. J Am Coll Cardiol. 2001;37:1891-900.                                                                              |    |    |    |    |    |    |   |    |    |    |    |    |    |    | X  |
|                                                                                                                                                                                                                                                                   | 16 | 20 | 42 | 26 | 24 | 62 | 7 | 13 | 14 | 13 | 27 | 18 | 17 | 19 | 74 |

ACS = acute coronary syndrome;

**% overlap** 63/286= 22.0%

**CA= Covered Area** = (16+20+42+26+24+62+7+13+14+13+27+18+17+19+74)/ (15x286) = 392/4290=9.1%

**CCA= Corrected Covered Area** = (392-286)/ (4290-286) = 106/4004= 2.6% (slight)

## Supplementary Annex 3.

**Citation Matrix:** Non-repeated trials (rows) included in the 36 systematic review and/or meta-analyses (column)--T2DM.

| Author-year ( Trial reference)                                                                                                                                                                                                     | 1 | 2 | 3 | 4 | 5 | 6 | 7 | 8 | 9 | 10 | 11 | 12 | 13 | 14 | 15 | 16 | 17 | 18 | 19 | 20 | 21 | 22 | 23 | 24 | 25 | 26 | 27 | 28 | 29 | 30 | 31 | 32 | 33 | 34 | 35 | 36 |  |
|------------------------------------------------------------------------------------------------------------------------------------------------------------------------------------------------------------------------------------|---|---|---|---|---|---|---|---|---|----|----|----|----|----|----|----|----|----|----|----|----|----|----|----|----|----|----|----|----|----|----|----|----|----|----|----|--|
| K. Cai, S. Zhang, M. Lu, L. Shao The effects of intensive education for elderly patients with diabetes mellitus. Pract Geriatr, 18 (2004), pp. 313–315                                                                             | X |   |   |   |   |   |   |   |   |    |    |    |    |    |    |    |    |    |    |    |    |    |    |    |    |    |    |    |    |    |    |    |    |    |    |    |  |
| Y. Chen, W. Xue, S. Lin, S. Huang, D. Li. ntensive diabetes education in the role of diabetes control. J Sun Yat-sen Univ (Med Sci), 3S (2004), pp. 201–203                                                                        | X |   |   |   |   |   |   |   |   |    |    |    |    |    |    |    |    |    |    |    |    |    |    |    |    |    |    |    |    |    |    |    |    |    |    |    |  |
| L. Chen, M. Zhu. Clinical investigation of the effect of type 2 diabetes health education. Strait Pharm J, 21 (2009), pp. 217–218                                                                                                  | X |   |   |   |   |   |   |   |   |    |    |    |    |    |    |    |    |    |    |    |    |    |    |    |    |    |    |    |    |    |    |    |    |    |    |    |  |
| Y. Fang. Coordinated health education model in diabetes education. Today Nurse, 3 (2011), pp. 148–149                                                                                                                              | X |   |   |   |   |   |   |   |   |    |    |    |    |    |    |    |    |    |    |    |    |    |    |    |    |    |    |    |    |    |    |    |    |    |    |    |  |
| B. Li, Y. Liu, J. Tian, J. Yuan. Impact of diabetes education for type 2 diabetes on glycated haemoglobin and health cost.Jiangsu J Prev Med, 23 (2012), pp. 55–56                                                                 | X |   |   |   |   |   |   |   |   |    |    |    |    |    |    |    |    |    |    |    |    |    |    |    |    |    |    |    |    |    |    |    |    |    |    |    |  |
| B.-h. Li, F.-h. Zhang, C. Zhang, M. Yang Effect of different education models on blood glucose in diabetic patients J Qilu Nurs, 19 (2013), pp. 26–27                                                                              | X |   |   |   |   |   |   |   |   |    |    |    |    |    |    |    |    |    |    |    |    |    |    |    |    |    |    |    |    |    |    |    |    |    |    |    |  |
| M. Li, T. Li, B.-y. Shi, C.-x. Gao Effect of motivational interviewing on the quality of life in type 2 diabetes patients with poor control of blood glucose Chin J Nurs, 49 (2014), pp. 6–10                                      | X |   |   |   |   |   |   |   |   |    |    |    |    |    |    |    |    |    |    |    |    |    |    |    |    |    |    |    |    |    |    |    |    |    |    |    |  |
| X. Li, Q. Zhou, F. Zou, L. Wu, H. Chen, Z. Liu Effectiveness of systematic self-management education on blood sugar level of patients in the community with type 2 diabetes J Central South Univ (Med Sci), 37 (2012), pp. 355–357 | X |   |   |   |   |   |   |   |   |    |    |    |    |    |    |    |    |    |    |    |    |    |    |    |    |    |    |    |    |    |    |    |    |    |    |    |  |
| Y. Li Evaluation of the standardized management effect of diabetes in community Chin Prim Health Care, 25 (2011), pp. 33–35                                                                                                        | X |   |   |   |   |   |   |   |   |    |    |    |    |    |    |    |    |    |    |    |    |    |    |    |    |    |    |    |    |    |    |    |    |    |    |    |  |
| Q. Liu, X. Pan, W. Feng, J. Kong Effectiveness of health education to the patients with diabetes mellitus J Nurs Sci, 20 (2005), pp. 54–55                                                                                         | X |   |   |   |   |   |   |   |   |    |    |    |    |    |    |    |    |    |    |    |    |    |    |    |    |    |    |    |    |    |    |    |    |    |    |    |  |
| Z.-p. Liu, L.-l. Han, J.-r. Deng, X.-r. Liu, X.-r. Zhang, Q.-f. Li Effect of short-term intensified education on glucose                                                                                                           | X |   |   |   |   |   |   |   |   |    |    |    |    |    |    |    |    |    |    |    |    |    |    |    |    |    |    |    |    |    |    |    |    |    |    |    |  |













































































[illegible]









[illegible]



[illegible]

1= Choi, Davidson, Walker, Lee, & Palermo, 2016; 2= Creamer, Attridge, Ramsden, Cannings-John, & Hawthorne, 2016; 3= Huang et al., 2016; 4= Chen et al., 2015; 5= Pillay et al., 2015; 6= Terranova,

Brakenridge, Lawler, Eakin, & Reeves, 2015; 7= Attridge, Creamer, Ramsden, Cannings-John, & Hawthorne, 2014; 8= Odnoletkova et al., 2014; 9 = Pal et al., 2014; 10 = Ricci-Cabello et al., 2014; 11= Saffari, Ghanizadeh, & Koenig, 2014; 12=Gucciardi, Chan, Manuel, & Sidani, 2013; 13=Pal et al., 2013; 14=Vugt, Wit, Cleijne, & Snoek, 2013; 15= Amaeshi, 2012 ; 16= Nam, Janson, Stotts, Chesla, & Kroon, 2012 ; 17= Steinsbekk, Rygg, Lisulo, Rise, & Fretheim, 2012; 18= Burke et al., 2011; 19= Kai Lun Gan, Brammer, & Creedy, 2011; 20=Ramadas, Quek, Chan, & Oldenburg, 2011; 21=Hawthorne, Robles, Cannings-John, & Edwards, 2010; 22= Minet, Moller, Vach, Wagner, & Henriksen, 2010; 23=Alam, Sturt, Lall, & Winkley, 2009; 24= Duke, Colagiuri, & Colagiuri, 2009; 25= Fan & Sidani, 2009; 26=Hawthorne, Robles, Cannings-John, & Edwards, 2008 ; 27=Khunti, Camosso-Stefinovic, Carey, Davies, & Stone, 2008; 28=Loveman, Frampton, & Clegg, 2008 ; 29=Wens et al., 2008; 30 = Nield et al., 2007; 31=Zabaleta & Forbes, 2007; 32=Deakin, McShane, Cade, & Williams, 2005; 33=Vermeire et al., 2005; 34=Gary, Genkinger, Guallar, Peyrot, & Brancati, 2003; 35=Norris, Lau, Smith, Schmid, & Engelgau, 2002; 36=Norris, Engelgau, & Narayan, 2001. T2DM = type 2 diabetes mellitus; NP = not applicable.

**% overlap**  $177/532 = 33.3\%$

**CA= Covered Area =**

$(53+28+17+16+132+13+33+17+20+39+10+13+16+13+8+12+26+15+7+20+10+47+35+9+11+11+20+8+36+3+14+21+62+31+84)/(35 \times 532) = 910/18620 = 4.8\%$  (one review did not report the included studies list)

**CCA= Corrected Covered Area =**  $(910-532) / (18620-532) = 378/18088 = 2.1\%$  (slight)
